# Supplementary material for: Proteomic analysis of formalin-fixed paraffin-embedded colorectal cancer tissue using tandem mass tag protein labeling
Source: Royal Society of Chemistry journal article supplement (doi:10.1039/c3mb70177h), 2013-08-28
Supplement: c3mb70177h.pdf [file c3mb70177h.pdf]

## Supplemental data

**Table S1:** Overview of all identified proteins found in the ACN dataset. All identified proteins contain at least one unique peptide and the overall protein score ( $-10\log P$ ) must be higher than 20 ( $FDR < 5\%$ ) to be selected as a confident identification.

**Table S2 :** Overview of all quantified proteins found in the ACN dataset. In order to be selected as quantified protein, reporter intensities of each of the six reporter ions should be available.

**Figure S1:** Heatmap of quantified proteins. Trends in upregulation of tumor samples (TMT 127,129,131) can be seen compared to control colon mucosa (TMT 126,128,130).
