# Supplementary material for: Proteomic analysis of formalin-fixed paraffin-embedded colorectal cancer tissue using tandem mass tag protein labeling
Source: Royal Society of Chemistry journal article supplement (doi:10.1039/c3mb70177h), 2013-08-28
Supplement: c3mb70177h.xlsx [file c3mb70177h.xlsx]

## Sheet: Blad1
Table S1 :	Overview of all identified proteins found in ACN dataset. All identified proteins contain at least one unique peptide and the overall protein score (-10logP) must be higher than 20 to be selected as a confident identification.
	Accession	-10lgP	Coverage (%)	#Peptides	#Unique	PTM	Mass (Da)	Description
1	IPI00008603	321.95	52	48	15	Y	42009	Tax_Id=9606 Gene_Symbol=ACTA2 Actin, aortic smooth muscle
2	IPI00025416	321.95	49	47	14	Y	41877	Tax_Id=9606 Gene_Symbol=ACTG2 Actin, gamma-enteric smooth muscle
3	IPI00930343	317.1	46	43	11	Y	42047	Tax_Id=9606 Gene_Symbol=ACTC1 cDNA FLJ78096, highly similar to Homo sapiens actin, alpha, cardiac muscle (ACTC), mRNA
4	IPI00023006	317.1	46	43	11	Y	42019	Tax_Id=9606 Gene_Symbol=ACTC1 Actin, alpha cardiac muscle 1
5	IPI00021428	317.1	46	43	11	Y	42051	Tax_Id=9606 Gene_Symbol=ACTA1 Actin, alpha skeletal muscle
6	IPI01011107	304.93	44	37	6	Y	37792	Tax_Id=9606 Gene_Symbol=ACTC1 Uncharacterized protein
7	IPI00878173	304.93	44	37	6	Y	37824	Tax_Id=9606 Gene_Symbol=ACTA1 cDNA FLJ39583 fis, clone SKMUS2004897, highly similar to ACTIN, ALPHA SKELETAL MUSCLE
8	IPI00916212	304.47	49	38	14	Y	37083	actin, gamma-enteric smooth muscle isoform 2 precursor
9	IPI01018712	303.48	53	38	15	Y	36807	Tax_Id=9606 Gene_Symbol=ACTA2 ACTA2 protein (Fragment)
10	IPI00220327	303.1	39	27	25	Y	66039	Tax_Id=9606 Gene_Symbol=KRT1 Keratin, type II cytoskeletal 1
11	IPI00930226	302.02	55	39	5	Y	39800	Tax_Id=9606 Gene_Symbol=ACTG1 cDNA FLJ57283, highly similar to Actin, cytoplasmic 2
12	IPI00021439	302.02	53	39	5	Y	41737	Tax_Id=9606 Gene_Symbol=ACTB Actin, cytoplasmic 1
13	IPI00021440	302.02	53	39	5	Y	41793	Tax_Id=9606 Gene_Symbol=ACTG1 Actin, cytoplasmic 2
14	IPI00984879	294.08	46	33	12	Y	37363	Tax_Id=9606 Gene_Symbol=ACTA2 cDNA FLJ52761, highly similar to Actin, aortic smooth muscle
15	IPI01011344	292.13	50	38	4	Y	37407	Tax_Id=9606 Gene_Symbol=ACTG1 Uncharacterized protein
16	IPI00465084	281.79	30	22	20	Y	53536	Tax_Id=9606 Gene_Symbo...
17	IPI00922693	281.52	40	33	2	Y	38579	Tax_Id=9606 Gene_Symbol=ACTB cDNA FLJ53662, highly similar to Actin, alpha skeletal muscle
18	IPI00218820	280.63	28	21	11	Y	28684	Tax_Id=9606 Gene_Symbol=TPM2 Isoform 3 of Tropomyosin beta chain
19	IPI00220709	280.63	25	21	11	Y	32990	Tax_Id=9606 Gene_Symbol=TPM2 Isoform 2 of Tropomyosin beta chain
20	IPI01015522	279.65	50	30	5	Y	38633	Tax_Id=9606 Gene_Symbol=ACTB cDNA FLJ55253, highly similar to Actin, cytoplasmic 1
21	IPI01018925	264.83	48	31	4	Y	37349	Tax_Id=9606 Gene_Symbol=ACTB cDNA FLJ58286, highly similar to Actin, cytoplasmic 2
22	IPI00019359	260.13	30	16	16	Y	62064	Tax_Id=9606 Gene_Symbol=KRT9 Keratin, type I cytoskeletal 9
23	IPI00645534	254.73	59	28	9	Y	16759	Tax_Id=9606 Gene_Symbol=ACTA2 Uncharacterized protein
24	IPI00921887	254.73	58	28	9	Y	17062	Tax_Id=9606 Gene_Symbol=- cDNA FLJ52755, highly similar to Actin, aortic smooth muscle
25	IPI00917820	254.73	54	27	8	Y	16271	Tax_Id=9606 Gene_Symbol=ACTG2 Uncharacterized protein
26	IPI00910712	253.08	21	18	11	Y	34098	Tax_Id=9606 Gene_Symbol=TPM2 cDNA FLJ57036, highly similar to Homo sapiens tropomyosin 2 (beta) (TPM2), transcript variant 2, mRNA
27	IPI00414057	251.28	35	26	5	Y	28165	Tax_Id=9606 Gene_Symbol=ACTA1 Uncharacterized protein
28	IPI00942659	247	54	22	3	Y	13859	Tax_Id=9606 Gene_Symbol=ACTB 14 kDa protein
29	IPI00894365	247	41	22	3	Y	17975	Tax_Id=9606 Gene_Symbol=ACTB cDNA FLJ52842, highly similar to Actin, cytoplasmic 1
30	IPI00654755	243.71	51	12	8	Y	15998	IPI:IPI00654755.3|SWISPROT:P68871
31	IPI00021304	243.14	38	14	10	Y	65865	Tax_Id=9606 Gene_Symbol=KRT2 Keratin, type II cytoskeletal 2 epidermal
32	IPI01012766	242.06	51	19	3	Y	33101	IPI:IPI01012766.1|TREMBL:A4UCT3;A5GZ75
33	IPI00216134	241.1	36	19	8	Y	32817	Tax_Id=9606 Gene_Symbol=TPM1 tropomyosin alpha-1 chain isoform 7
34	IPI00915324	239.42	33	18	7	Y	32649	Tax_Id=9606 Gene_Symbol=TPM1 Isoform 6 of Tropomyosin alpha-1 chain
35	IPI00000230	239.42	33	18	7	Y	32678	Tax_Id=9606 Gene_Symbol=TPM1 tropomyosin alpha-1 chain isoform 2
36	IPI00940343	239.42	29	18	7	Y	37453	Tax_Id=9606 Gene_Symbol=TPM1 cDNA FLJ16459 fis, clone BRCAN2002473, moderately similar to Tropomyosin, fibroblast isoform 2
37	IPI01018810	239.22	69	11	8	Y	9689	Tax_Id=9606 Gene_Symbol=HBB Mutant beta-globin
38	IPI00796636	239.22	68	11	8	Y	9670	Tax_Id=9606 Gene_Symbol=HBB Uncharacterized protein
39	IPI01018020	239.22	35	11	8	Y	18931	Tax_Id=9606 Gene_Symbol=HBB Beta-globin gene from a thalassemia patient
40	IPI00514530	238.17	38	23	1	Y	32275	Tax_Id=9606 Gene_Symbol=ACTA1 Uncharacterized protein
41	IPI00216135	234.26	30	17	6	Y	32876	Tax_Id=9606 Gene_Symbol=TPM1 Isoform 3 of Tropomyosin alpha-1 chain
42	IPI00296039	234.26	30	17	6	Y	32848	Tax_Id=9606 Gene_Symbol=TPM1 Isoform 4 of Tropomyosin alpha-1 chain
43	IPI00970818	234.26	30	17	6	Y	32866	Tax_Id=9606 Gene_Symbol=TPM1 tropomyosin alpha-1 chain isoform 5
44	IPI00014581	232.35	27	16	5	Y	32709	Tax_Id=9606 Gene_Symbol=TPM1 Isoform 1 of Tropomyosin alpha-1 chain
45	IPI00604537	232.35	27	16	5	Y	32737	Tax_Id=9606 Gene_Symbol=TPM1 tropomyosin alpha-1 chain isoform 3
46	IPI00745267	230.3	32	16	5	Y	26680	Tax_Id=9606 Gene_Symbol=TPM1 Isoform 2 of Tropomyosin alpha-1 chain
47	IPI01018017	230.3	30	16	5	Y	27547	Tax_Id=9606 Gene_Symbol=TPM1 Uncharacterized protein
48	IPI00018853	230.3	30	16	5	Y	28420	Tax_Id=9606 Gene_Symbol=TPM1 Tropomyosin isoform
49	IPI00384369	230.3	29	16	5	Y	28509	Tax_Id=9606 Gene_Symbol=TPM1 Tropomyosin 1 alpha variant 6
50	IPI01017955	230.3	26	16	5	Y	31753	Tax_Id=9606 Gene_Symbol=- cDNA FLJ55130, highly similar to Rattus norvegicus tropomyosin 1, alpha (Tpm1), transcript variant 8, mRNA
51	IPI00917282	229.16	48	20	2	Y	11403	Tax_Id=9606 Gene_Symbol=ACTG2 Uncharacterized protein
52	IPI00917457	229.16	42	20	2	Y	12969	Tax_Id=9606 Gene_Symbol=ACTG2 Uncharacterized protein
53	IPI01012191	228.24	26	15	4	Y	28385	Tax_Id=9606 Gene_Symbol=TPM1 Isoform 5 of Tropomyosin alpha-1 chain
54	IPI00921977	228.24	25	15	4	Y	28608	Tax_Id=9606 Gene_Symbol=TPM1 cDNA FLJ54760, highly similar to Rattus norvegicus tropomyosin 1, alpha (Tpm1), transcript variant 7, mRNA
55	IPI00646748	226.11	20	13	3	Y	32815	Tax_Id=9606 Gene_Symbol=TPM2 Uncharacterized protein
56	IPI00013991	226.11	20	13	3	Y	32851	Tax_Id=9606 Gene_Symbol=TPM2 Isoform 1 of Tropomyosin beta chain
57	IPI00513698	226.11	17	13	3	Y	36747	Tax_Id=9606 Gene_Symbol=TPM2 Uncharacterized protein
58	IPI00216138	224.43	57	18	18	Y	22611	IPI:IPI00216138.6|SWISS-PROT:Q01995
59	IPI00218320	224.07	26	12	2	Y	28955	Tax_Id=9606 Gene_Symbol=TPM3 Isoform 3 of Tropomyosin alpha-3 chain
60	IPI00382894	224.07	25	12	2	Y	28922	Tax_Id=9606 Gene_Symbol=TPM3 Uncharacterized protein
61	IPI00218319	224.07	25	12	2	Y	29033	Tax_Id=9606 Gene_Symbol=TPM3 Isoform 2 of Tropomyosin alpha-3 chain
62	IPI00967467	224.07	22	12	2	Y	33223	Tax_Id=9606 Gene_Symbol=TPM3 33 kDa protein
63	IPI00010779	220.31	21	11	1	Y	28522	Tax_Id=9606 Gene_Symbol=TPM4 Isoform 1 of Tropomyosin alpha-4 chain
64	IPI00216975	220.31	18	11	1	Y	32723	Tax_Id=9606 Gene_Symbol=TPM4 Isoform 2 of Tropomyosin alpha-4 chain
65	IPI00009865	218.79	27	11	10	Y	58827	Tax_Id=9606 Gene_Symbol=KRT10 Keratin, type I cytoskeletal 10
66	IPI00745872	217.97	19	17	16	Y	69367	Tax_Id=9606 Gene_Symbol=ALB Isoform 1 of Serum albumin
67	IPI00878517	215.46	22	16	15	Y	56212	Tax_Id=9606 Gene_Symbol=ALB Uncharacterized protein
68	IPI00908876	215.46	21	16	15	Y	59574	Tax_Id=9606 Gene_Symbol=ALB cDNA FLJ50830, highly similar to Serum albumin
69	IPI00477649	214.69	23	11	1	Y	28793	Tax_Id=9606 Gene_Symbol=TPM3 tropomyosin alpha-3 chain isoform 5
70	IPI00479185	214.69	23	11	1	Y	28870	Tax_Id=9606 Gene_Symbol=TPM3 tropomyosin alpha-3 chain isoform 4
71	IPI00183968	214.69	20	11	1	Y	32950	Tax_Id=9606 Gene_Symbol=TPM3 tropomyosin alpha-3 chain isoform 1
72	IPI00982925	214.14	63	8	5	Y	6998	Tax_Id=9606 Gene_Symbol=- Truncated beta-globin
73	IPI00940084	213.05	14	14	4	Y	34402	Tax_Id=9606 Gene_Symbol=TPM1 TPM1 protein variant (Fragment)
74	IPI00966829	209.64	18	15	14	Y	69227	Tax_Id=9606 Gene_Symbol=ALB 69 kDa protein
75	IPI00022434	209.64	17	15	14	Y	71705	Tax_Id=9606 Gene_Symbol=ALB Uncharacterized protein
76	IPI00965913	208.82	22	15	14	Y	51578	Tax_Id=9606 Gene_Symbol=ALB Protein
77	IPI00965074	208.82	22	15	14	Y	52059	Tax_Id=9606 Gene_Symbol=ALB Uncharacterized protein
78	IPI00642042	208.63	19	11	2	Y	27175	Tax_Id=9606 Gene_Symbol=TPM3 Putative uncharacterized protein DKFZp686J1372
79	IPI00410714	206.75	36	10	10	Y	15258	Tax_Id=9606 ...
80	IPI00807522	202.44	48	10	1	Y	11464	Tax_Id=9606 Gene_Symbol=ACTB ACTB protein (Fragment)
81	IPI00442894	201.35	19	12	2	Y	24884	Tax_Id=9606 Gene_Symbol=TPM1 cDNA FLJ26372 fis, clone HRT06233
82	IPI00216456	194.82	74	26	1	Y	14105	Tax_Id=9606 Gene_Symbol=HIST1H2AC Histone H2A type 1-C
83	IPI00297646	194.31	12	15	15	Y	138942	Tax_Id=9606 Gene_Symbol=COL1A1 Collagen alpha-1(I) chain
84	IPI00418471	193.48	32	14	12	Y	53652	Tax_Id=9606 Gene_Symbol=VIM Vimentin
85	IPI00975690	193.48	33	13	11	Y	49653	Tax_Id=9606 Gene_Symbol=VIM Vimentin variant 3
86	IPI00981034	192.9	40	9	9	Y	16852	Tax_Id=9606 Gene_Symbol=TAGLN Protein
87	IPI00384697	192.61	16	11	11	Y	47361	Tax_Id=9606 Gene_Symbol=ALB Isoform 2 of Serum albumin
88	IPI00025512	192.58	29	8	3	Y	22783	Tax_Id=9606 Gene_Symbol=HSPB1 Heat shock protein beta-1
89	IPI00031562	192.42	68	25	1	Y	14121	Tax_Id=9606 Gene_Symbol=HIST3H2A Histone H2A type 3
90	IPI00026272	192.42	68	24	2	Y	14135	Tax_Id=9606 Gene_Symbol=HIST1H2AE;HIST1H2AB;HIST...
91	IPI00339274	191.49	66	25	1	Y	13988	Tax_Id=9606 Gene_Symbol=HIST2H2AC Histone H2A type 2-C
92	IPI00216457	191.49	65	25	1	Y	14095	Tax_Id=9606 Gene_Symbol=HIST2H2AA4 Histone H2A type 2-A
93	IPI00953582	191.02	14	10	10	Y	47287	Tax_Id=9606 Gene_Symbol=ALB Uncharacterized protein
94	IPI00081836	183.27	66	24	1	Y	13906	Tax_Id=9606 Gene_Symbol=HIST1H2AH Histone H2A type 1-H
95	IPI00552873	183.27	66	24	1	Y	13936	Tax_Id=9606 Gene_Symbol=HIST1H2A Histone H2A type 1-J
96	IPI00291764	183.27	65	24	1	Y	14091	IPI:IPI00291764.5|SWISS-PROT:P0C0S8
97	IPI00644576	182.58	4	11	11	Y	276548	Tax_Id=9606 Gene_Symbol=FLNA Uncharacterized protein
98	IPI00302592	182.58	4	11	11	Y	280016	Tax_Id=9606 Gene_Symbol=FLNA Isoform 2 of Filamin-A
99	IPI00333541	182.58	4	11	11	Y	280737	Tax_Id=9606 Gene_Symbol=FLNA Isoform 1 of Filamin-A
100	IPI00556415	181.02	37	7	7	Y	18319	Tax_Id=9606 Gene_Symbol=TAGLN Uncharacterized protein
101	IPI00255316	180.66	60	23	1	Y	14107	Tax_Id=9606 Gene_Symbol=HIST1H2AD Histone H2A type 1-D
102	IPI00219037	179.84	55	23	1	Y	15145	Tax_Id=9606 Gene_Symbol=H2AFX Histone H2A.x
103	IPI00304962	176.75	13	15	15	Y	129314	Tax_Id=9606 Gene_Symbol=COL1A2 Collagen alpha-2(I) chain
104	IPI01014827	176.75	13	15	15	Y	129523	Tax_Id=9606 Gene_Symbol=COL1A2 Uncharacterized protein
105	IPI00917545	173.5	52	11	2	Y	5570	Tax_Id=9606 Gene_Symbol=ACTG2 Uncharacterized protein
106	IPI00909207	167.93	32	5	4	Y	20107	Tax_Id=9606 Gene_Symbol=PRDX2 cDNA FLJ60461, highly similar to Peroxiredoxin-2
107	IPI00027350	167.93	30	5	4	Y	21892	Tax_Id=9606 Gene_Symbol=PRDX2 Peroxiredoxin-2
108	IPI00216773	161.34	14	8	8	Y	45160	Tax_Id=9606 Gene_Symbol=ALB Uncharacterized protein
109	IPI00909453	159.39	21	6	3	Y	18536	Tax_Id=9606 Gene_Symbol=HSPB1 cDNA FLJ52243, highly similar to Heat-shock protein beta-1
110	IPI01022236	159.35	20	7	2	Y	46510	Tax_Id=9606 Gene_Symbol=TUBB Uncharacterized protein
111	IPI00645452	159.35	20	7	2	Y	47767	IPI:IPI00645452.1|TREMBL:B4DQN9
112	IPI01022164	159.35	20	7	2	Y	48461	Tax_Id=9606 Gene_Symbol=TUBB Uncharacterized protein
113	IPI01020686	159.35	20	7	2	Y	48519	Tax_Id=9606 Gene_Symbol=TUBB Uncharacterized protein
114	IPI01019113	159.35	19	7	2	Y	49671	IPI:IPI01019113.1|SWISS-PROT:P07437
115	IPI01025656	159.35	18	7	2	Y	52048	Tax_Id=9606 Gene_Symbol=TUBB cDNA FLJ56903, highly similar to Tubulin beta-7 chain
116	IPI00815947	158.66	78	5	3	Y	4508	Tax_Id=9606 Gene_Symbol=HBB Truncated beta-globin (Fragment)
117	IPI00473011	153.77	30	5	1	Y	16055	Tax_Id=9606 Gene_Symbol=HBD Hemoglobin subunit delta
118	IPI00924436	149.58	30	6	1	Y	20406	Tax_Id=9606 Gene_Symbol=HSPB1 Uncharacterized protein
119	IPI00970839	146.28	26	5	3	Y	11520	Tax_Id=9606 Gene_Symbol=LOC727848;POTEI Actin-like protein (Fragment)
120	IPI00908770	144.71	19	5	1	Y	35921	Tax_Id=9606 Gene_Symbol=TUBB cDNA FLJ53063, highly similar to Tubulin beta-7 chain
121	IPI00982343	143.36	60	9	9	Y	10349	Tax_Id=9606 Gene_Symbol=TAGLN Uncharacterized protein
122	IPI00930130	142.57	18	7	2	Y	44602	Tax_Id=9606 Gene_Symbol=TUBB6 cDNA FLJ11352 fis, clone HEMBA1000020, highly similar to Tubulin beta-2C chain
123	IPI00007752	142.57	16	7	2	Y	49831	Tax_Id=9606 Gene_Symbol=TUBB2C Tubulin beta-2C chain
124	IPI00220278	142.45	39	8	2	Y	19827	Tax_Id=9606 Gene_Symbol=MYL9 Myosin regulatory light polypeptide 9
125	IPI00555733	140.31	20	4	3	Y	11812	Tax_Id=9606 Gene_Symbol=- Actin-like protein (Fragment)
126	IPI00640741	139.24	28	5	4	Y	18976	Tax_Id=9606 Gene_Symbol=PRDX1 19 kDa protein
127	IPI00000874	139.24	24	5	4	Y	22110	Tax_Id=9606 Gene_Symbol=PRDX1 Peroxiredoxin-1
128	IPI00472739	138.83	23	5	5	Y	29533	Tax_Id=9606 Gene_Symbol=TPSAB1 Isoform 2 of Tryptase alpha/beta-1
129	IPI00915376	138.83	22	5	5	Y	30651	Tax_Id=9606 Gene_Symbol=TPSB2 tryptase beta-2 precursor
130	IPI00419942	138.83	22	5	5	Y	30515	Tax_Id=9606 Gene_Symbol=TPSAB1;TPSB2 Tryptase beta-2
131	IPI00010274	138.83	22	5	5	Y	30713	Tax_Id=9606 Gene_Symbol=TPSAB1 TPSAB1 protein
132	IPI00946599	138.83	22	5	5	Y	31282	Tax_Id=9606 Gene_Symbol=TPSAB1 TPSB2 protein
133	IPI00031370	135.71	13	5	1	Y	49953	Tax_Id=9606 Gene_Symbol=TUBB2B Tubulin beta-2B chain
134	IPI00930715	135.71	13	5	1	Y	49897	Tax_Id=9606 Gene_Symbol=TUBB2A cDNA, FLJ93005, highly similar to Homo sapiens tubulin, beta polypeptide (TUBB), mRNA
135	IPI00013475	135.71	13	5	1	Y	49907	Tax_Id=9606 Gene_Symbol=TUBB2A Tubulin beta-2A chain
136	IPI00072918	135.36	5	12	12	Y	322186	Tax_Id=9606 Gene_Symbol=COL6A3 Uncharacterized protein
137	IPI00072917	135.36	5	12	12	Y	322000	Tax_Id=9606 Gene_Symbol=COL6A3 Uncharacterized protein
138	IPI00022200	135.36	5	12	12	Y	343668	Tax_Id=9606 Gene_Symbol=COL6A3 Isoform 1 of Collagen alpha-3(VI) chain
139	IPI00946286	135.36	5	11	11	Y	278201	Tax_Id=9606 Gene_Symbol=COL6A3 collagen alpha-3(VI) chain isoform 4 precursor
140	IPI00220701	135.36	5	11	11	Y	321353	Tax_Id=9606 Gene_Symbol=COL6A3 Isoform 2 of Collagen alpha-3(VI) chain
141	IPI00009867	134.41	17	8	5	N	62378	Tax_Id=9606 Gene_Symbol=KRT5 Keratin, type II cytoskeletal 5
142	IPI00022433	132.3	47	5	5	Y	18783	Tax_Id=9606 Gene_Symbol=HSPB6 Heat shock protein beta-6
143	IPI00553169	129.53	3	8	8	Y	245864	Tax_Id=9606 Gene_Symbol=FLNA Uncharacterized protein
144	IPI00854592	129.27	21	4	2	Y	26282	Tax_Id=9606 Gene_Symbol=TPM3 Uncharacterized protein
145	IPI01013595	128.17	13	5	4	Y	62663	Tax_Id=9606 Gene_Symbol=CALD1 Isoform 4 of Caldesmon
146	IPI00925125	128.17	13	5	4	Y	65620	Tax_Id=9606 Gene_Symbol=CALD1 caldesmon isoform 3
147	IPI00218694	128.17	13	5	4	Y	65707	Tax_Id=9606 Gene_Symbol=CALD1 Isoform 2 of Caldesmon
148	IPI00014516	128.17	9	5	4	Y	93231	Tax_Id=9606 Gene_Symbol=CALD1 Isoform 1 of Caldesmon
149	IPI00908768	127.64	21	4	4	N	21063	Tax_Id=9606 Gene_Symbol=HSPB6 cDNA FLJ51906, highly similar to Heat-shock protein beta-6
150	IPI00796776	126.07	16	7	4	N	58851	Tax_Id=9606 Gene_Symbol=KRT5 cDNA FLJ54081, highly similar to Keratin, type II cytoskeletal 5
151	IPI00398625	125.83	1	4	4	N	282389	Tax_Id=9606 Gene_Symbol=HRNR Hornerin
152	IPI00853163	124.23	7	3	3	Y	46087	Tax_Id=9606 Gene_Symbol=TYMP Uncharacterized protein
153	IPI00292858	124.23	6	3	3	Y	49956	Tax_Id=9606 Gene_Symbol=...
154	IPI00852987	124.23	6	3	3	Y	50405	Tax_Id=9606 Gene_Symbol=TYMP cDNA, FLJ95575, highly similar to Homo sapiens endothelial cell growth factor 1 (platelet-derived) (ECGF1), mRNA
155	IPI00293276	116.47	23	4	4	Y	12476	Tax_Id=9606 Gene_Symbol=MIF Macrophage migration inhibitory factor
156	IPI00333771	115.85	11	4	3	Y	61213	Tax_Id=9606 Gene_Symbol=CALD1 Isoform 5 of Caldesmon
157	IPI00218696	115.85	11	4	3	Y	62742	Tax_Id=9606 Gene_Symbol=CALD1 cDNA FLJ53193, highly similar to Homo sapiens caldesmon 1 (CALD1), transcript variant 5, mRNA
158	IPI01014398	115.85	11	4	3	Y	64169	Tax_Id=9606 Gene_Symbol=CALD1 Uncharacterized protein
159	IPI00218695	115.85	11	4	3	Y	64256	Tax_Id=9606 Gene_Symbol=CALD1 Isoform 3 of Caldesmon
160	IPI00878282	115.02	21	4	4	Y	22859	Tax_Id=9606 Gene_Symbol=ALB 23 kDa protein
161	IPI00045109	113.61	60	11	1	Y	14233	Tax_Id=9606 Gene_Symbol=HIST1H2AA Histone H2A type 1-A
162	IPI01015284	113.17	8	3	1	Y	50373	Tax_Id=9606 Gene_Symbol=MC1R Tubulin, beta, 4 variant (Fragment)
163	IPI00013683	113.17	8	3	1	Y	50433	Tax_Id=9606 Gene_Symbol=TUBB3;MC1R Tubulin beta-3 chain
164	IPI01013705	113.17	8	3	1	Y	50405	Tax_Id=9606 Gene_Symbol=MC1R cDNA, FLJ95457, highly similar to Homo sapiens tubulin, beta, 4 (TUBB4), mRNA
165	IPI01026194	113.17	5	3	1	Y	88382	Tax_Id=9606 Gene_Symbol=TUBB3 88 kDa protein
166	IPI01019017	113.02	6	2	2	Y	59842	IPI:IPI01019017.1|TREMBL:B3KTT5
167	IPI00911039	113.02	5	2	2	Y	63924	Tax_Id=9606 Gene_Symbol=HSPA1B;HSPA1A cDNA FLJ54408, highly similar to Heat shock 70 kDa protein 1
168	IPI01020720	113.02	5	2	2	Y	67531	Tax_Id=9606 Gene_Symbol=HSPA1B;HSPA1A cDNA FLJ54328, highly similar to Heat shock 70 kDa protein 1
169	IPI01013544	113.02	5	2	2	Y	68008	Tax_Id=9606 Gene_Symbol=HSPA1B;HSPA1A Uncharacterized protein
170	IPI01011434	113.02	5	2	2	Y	68105	Tax_Id=9606 Gene_Symbol=HSPA1B;HSPA1A Uncharacterized protein
171	IPI00304925	113.02	5	2	2	Y	70052	IPI:IPI00304925.5|SWISS-PROT:P08107
172	IPI00845339	113.02	5	2	2	Y	70038	Tax_Id=9606 Gene_Symbol=HSPA1B;HSPA1A cDNA FLJ54370, highly similar to Heat shock 70 kDa protein 1
173	IPI01021821	110.31	28	3	3	Y	17051	Tax_Id=9606 Gene_Symbol=HSP90B1 Protein
174	IPI00939289	110.31	7	3	3	Y	64221	Tax_Id=9606 Gene_Symbol=HSP90B1 Uncharacterized protein
175	IPI00027230	110.31	5	3	3	Y	92469	Tax_Id=9606 Gene_Symbol=HSP90B1 Endoplasmin
176	IPI00926274	110.27	12	4	3	Y	54159	Tax_Id=9606 Gene_Symbol=CALD1 Uncharacterized protein
177	IPI00956684	109.58	14	3	3	Y	24086	Tax_Id=9606 Gene_Symbol=LGALS3 galectin-3 isoform 2
178	IPI00465431	109.58	13	3	3	Y	26152	Tax_Id=9606 Gene_Symbol=LGALS3 Galectin-3
179	IPI01026139	109.58	13	3	3	Y	26161	Tax_Id=9606 Gene_Symbol=LGALS3 LGALS3 protein (Fragment)
180	IPI01018966	109.54	24	2	2	Y	13789	Tax_Id=9606 Gene_Symbol=UBC Uncharacterized protein
181	IPI01013317	109.54	23	2	2	Y	15355	Tax_Id=9606 Gene_Symbol=RPS27A 40S ribosomal protein S27a
182	IPI01014596	109.54	22	2	2	Y	15032	Tax_Id=9606 Gene_Symbol=UBC Uncharacterized protein
183	IPI01014205	109.54	22	2	2	Y	15310	Tax_Id=9606 Gene_Symbol=UBC Uncharacterized protein
184	IPI01015565	109.54	20	2	2	Y	16841	Tax_Id=9606 Gene_Symbol=UBC Uncharacterized protein
185	IPI01011805	109.54	20	2	2	Y	17215	Tax_Id=9606 Gene_Symbol=UBB cDNA FLJ51326, highly similar to Homo sapiens ubiquitin B (UBB), mRNA
186	IPI01015113	109.54	19	2	2	Y	17484	Tax_Id=9606 Gene_Symbol=UBC Uncharacterized protein
187	IPI01015985	109.54	18	2	2	Y	19006	Tax_Id=9606 Gene_Symbol=UBC Uncharacterized protein
188	IPI01011412	109.54	6	2	2	Y	59935	Tax_Id=9606 Gene_Symbol=UBC Uncharacterized protein
189	IPI01015749	109.54	5	2	2	Y	68482	Tax_Id=9606 Gene_Symbol=UBC cDNA FLJ75516, highly similar to Xenopus tropicalis ubiquitin C, mRNA
190	IPI00953417	109.29	17	3	2	Y	27436	Tax_Id=9606 Gene_Symbol=TUBB Uncharacterized protein
191	IPI00022432	108.62	24	3	3	Y	15887	Tax_Id=9606 Gene_Symbol=TTR Transthyretin
192	IPI00855916	108.62	20	3	3	Y	20199	Tax_Id=9606 Gene_Symbol=- Transthyretin
193	IPI00940791	108.62	20	3	3	Y	20294	Tax_Id=9606 Gene_Symbol=TTR Uncharacterized protein
194	IPI00550363	108.58	13	2	2	Y	22391	Tax_Id=9606 Gene_Symbol=TAGLN2 Transgelin-2
195	IPI00647915	108.58	12	2	2	Y	24454	Tax_Id=9606 Gene_Symbol=TAGLN2 24 kDa protein
196	IPI00641244	107.69	31	4	3	Y	10676	Tax_Id=9606 Gene_Symbol=PRDX1 11 kDa protein
197	IPI00219219	107.43	32	2	2	Y	14716	Tax_Id=9606 Gene_Symbol=LGALS1 Galectin-1
198	IPI00925411	107.3	30	2	2	Y	13022	Tax_Id=9606 Gene_Symbol=PPIA Uncharacterized protein
199	IPI00925747	107.3	30	2	2	Y	13208	Tax_Id=9606 Gene_Symbol=PPIA Peptidyl-prolyl cis-trans isomerase
200	IPI00910407	107.3	28	2	2	Y	14085	Tax_Id=9606 Gene_Symbol=PPIA Peptidyl-prolyl cis-trans isomerase
201	IPI00419585	107.3	22	2	2	Y	18012	Tax_Id=9606 Gene_Symbol=PPIA Peptidyl-prolyl cis-trans isomerase A
202	IPI00982595	106.61	22	4	2	Y	26859	Tax_Id=9606 Gene_Symbol=VIM Vimentin variant 4
203	IPI00030929	105.07	32	6	1	Y	13866	Tax_Id=9606 Gene_Symbol=MYL9 myosin regulatory light polypeptide 9 isoform b
204	IPI00793930	103.08	13	4	2	Y	37218	Tax_Id=9606 Gene_Symbol=TUBA1B TUBA1B protein
205	IPI01022358	103.08	10	4	2	Y	46297	Tax_Id=9606 Gene_Symbol=TUBA1A Alpha-tubulin
206	IPI00218343	103.08	10	4	2	Y	49895	Tax_Id=9606 Gene_Symbol=TUBA1C Tubulin alpha-1C chain
207	IPI00930688	103.08	10	4	2	Y	50152	Tax_Id=9606 Gene_Symbol=TUBA1B Tubulin alpha-1B chain
208	IPI00180675	103.08	10	4	2	Y	50136	Tax_Id=9606 Gene_Symbol=TUBA1A Tubulin alpha-1A chain
209	IPI00387144	103.08	8	4	2	Y	57760	Tax_Id=9606 Gene_Symbol=TUBA1C cDNA FLJ55956, highly similar to Tubulin alpha-6 chain
210	IPI00166768	103.08	10	3	2	Y	36743	Tax_Id=9606 Gene_Symbol=TUBA1C Uncharacterized protein
211	IPI01021600	103.08	41	2	2	N	5319	Tax_Id=9606 Gene_Symbol=TUBA1B Uncharacterized protein
212	IPI01022238	103.08	27	2	2	N	8288	Tax_Id=9606 Gene_Symbol=TUBA1B Uncharacterized protein
213	IPI01021237	103.08	25	2	2	N	8944	Tax_Id=9606 Gene_Symbol=TUBA1B Uncharacterized protein
214	IPI01022495	103.08	18	2	2	N	12220	Tax_Id=9606 Gene_Symbol=TUBA1A Uncharacterized protein
215	IPI01020940	103.08	15	2	2	N	14401	Tax_Id=9606 Gene_Symbol=TUBA1C Uncharacterized protein
216	IPI01021483	103.08	9	2	2	N	24221	Tax_Id=9606 Gene_Symbol=TUBA1A Uncharacterized protein
217	IPI01021407	103.08	8	2	2	N	27552	Tax_Id=9606 Gene_Symbol=TUBA1B Uncharacterized protein
218	IPI00909530	102.9	48	6	5	Y	12918	Tax_Id=9606 Gene_Symbol=H3F3A;H3F3B;H3F3AP6;H3F3AP4 cDNA FLJ52843, highly similar to Histone H3.3
219	IPI00419884	102.9	40	6	5	Y	15214	Tax_Id=9606 Gene_Symbol=H3F3C Histone H3.3C
220	IPI00219038	102.9	40	6	5	Y	15328	IPI:IPI00219038.9|SWISS-PROT:P84243
221	IPI00171611	102.9	40	6	5	Y	15388	Tax_Id=9606 Gene_Symbol=HIST2H3D;HIST2H3A;HIST2H3C Histon...
222	IPI00465070	102.9	40	6	5	Y	15404	IPI:IPI00465070.7|SWISS-PROT:P68431
223	IPI01022933	102.51	21	2	2	Y	15021	Tax_Id=9606 Gene_Symbol=MYL6 Uncharacterized protein
224	IPI01022268	102.51	20	2	2	Y	16290	Tax_Id=9606 Gene_Symbol=MYL6 Uncharacterized protein
225	IPI00789605	102.51	19	2	2	Y	16961	Tax_Id=9606 Gene_Symbol=MYL6 Isoform Smooth muscle of Myosin light polypeptide 6
226	IPI00335168	102.51	19	2	2	Y	16930	Tax_Id=9606 Gene_Symbol=MYL6 Isoform Non-muscle of Myosin light polypeptide 6
227	IPI01022653	102.51	19	2	2	Y	17058	Tax_Id=9606 Gene_Symbol=MYL6 17 kDa protein
228	IPI01022179	102.51	19	2	2	Y	17089	Tax_Id=9606 Gene_Symbol=MYL6 17 kDa protein
229	IPI01021801	102.51	18	2	2	Y	18037	Tax_Id=9606 Gene_Symbol=MYL6 18 kDa protein
230	IPI00796366	102.51	12	2	2	Y	26707	Tax_Id=9606 Gene_Symbol=MYL6 cDNA FLJ56329, highly similar to Myosin light polypeptide 6
231	IPI00220739	102.47	12	2	2	Y	21671	Tax_Id=9606 Gene_Symbol=PGRMC1 Membrane-associated progesterone receptor component 1
232	IPI01020842	101.06	15	3	2	N	23119	Tax_Id=9606 Gene_Symbol=KRT5 Protein
233	IPI01021125	101.06	11	2	1	N	21974	Tax_Id=9606 Gene_Symbol=KRT5 Protein
234	IPI00220573	100.46	27	7	1	Y	19794	Tax_Id=9606 Gene_Symbol=MYL12A Myosin regulatory light chain 12A
235	IPI00033494	100.46	27	7	1	Y	19779	Tax_Id=9606 Gene_Symbo...
236	IPI00291175	99.86	8	4	4	Y	116722	Tax_Id=9606 Gene_Symbol=VCL Isoform 1 of Vinculin
237	IPI00307162	99.86	7	4	4	Y	123799	Tax_Id=9606 Gene_Symbol=VCL Isoform 2 of Vinculin
238	IPI00910430	96.99	36	3	3	N	8622	Tax_Id=9606 Gene_Symbol=- cDNA FLJ51314, weakly similar to Heat-shock protein beta-6
239	IPI01015306	95.94	9	2	2	N	15120	Tax_Id=9606 Gene_Symbol=TTR Uncharacterized protein
240	IPI00719669	94.24	22	6	1	Y	19678	Tax_Id=9606 Gene_Symbol=MYL12B Similar to Myosin regulatory light chain MRCL2
241	IPI00807611	94.16	28	3	2	Y	17767	Tax_Id=9606 Gene_Symbol=CALD1 CALD1 protein (Fragment)
242	IPI00816770	94.16	8	3	2	Y	61706	Tax_Id=9606 Gene_Symbol=CALD1 Uncharacterized protein
243	IPI01014563	94.08	12	1	1	Y	20020	Tax_Id=9606 Gene_Symbol=FTL Ferritin light chain
244	IPI00216402	93.88	33	5	4	Y	15508	Tax_Id=9606 Gene_Symbol=HIST3H3 Histone H3.1t
245	IPI00477080	93.39	34	5	4	Y	14053	Tax_Id=9606 Gene_Symbol=H3F3A;H3F3B;H3F3AP6;H3F3AP4 cDNA FLJ57905, moderately similar to Histone H3.3
246	IPI00455457	93.39	31	5	4	Y	15430	Tax_Id=9606 Gene_Symbol=- Uncharacterized protein
247	IPI00025252	92.59	5	2	2	Y	56782	Tax_Id=9606 Gene_Symbol=PDIA3 Protein disulfide-isomerase A3
248	IPI00941465	90.22	4	9	9	Y	325293	Tax_Id=9606 Gene_Symbol=COL6A3 Uncharacterized protein
249	IPI00027827	89.09	11	2	2	N	25851	Tax_Id=9606 Gene_Symbol=SOD3 Extracellular superoxide dismutase [Cu-Zn]
250	IPI00220403	88.64	23	4	3	Y	13950	Tax_Id=9606 Gene_Symbol=HIST1H2BB Histone H2B type 1-B
251	IPI00419833	88.64	23	4	3	Y	13890	Tax_Id=9606 Gene_Symbol=HIST1H2BK Histone H2B type 1-K
252	IPI00329665	88.64	23	4	3	Y	13920	Tax_Id=9606 Gene_Symbol=HIST2H2BF Histone H2B type 2-F
253	IPI00303133	88.64	23	4	3	Y	13892	Tax_Id=9606 Gene_Symbol=HIST1H2BH Histone H2B type 1-H
254	IPI00554798	88.64	23	4	3	Y	13989	Tax_Id=9606 Gene_Symbol=HIST1H2BM Histone H2B type 1-M
255	IPI00020101	88.64	23	4	3	Y	13906	IPI:IPI00020101.9|SWISS-PROT:P62807
256	IPI00152906	88.64	23	4	3	Y	13936	Tax_Id=9606 Gene_Symbol=HIST1H2BD Histone H2B type 1-D
257	IPI00815755	88.64	23	4	3	Y	13834	Tax_Id=9606 Gene_Symbol=HIST1H2BC HIST1H2BC protein
258	IPI00515061	88.64	23	4	3	Y	13904	Tax_Id=9606 Gene_Symbol=HIST1H2BJ Histone H2B type 1-J
259	IPI00003935	88.64	23	4	3	Y	13920	Tax_Id=9606 Gene_Symbol=HIST2H2BE Histone H2B type 2-E
260	IPI00018534	88.64	23	4	3	Y	13952	Tax_Id=9606 Gene_Symbol=HIST1H2BL Histone H2B type 1-L
261	IPI00152785	88.64	23	4	3	Y	13906	Tax_Id=9606 Gene_Symbol=HIST1H2BO Histone H2B type 1-O
262	IPI00930174	88.64	22	4	3	Y	14841	Tax_Id=9606 Gene_Symbol=HIST2H2BF histone H2B type 2-F isoform b
263	IPI00646240	88.64	17	4	3	Y	18041	Tax_Id=9606 Gene_Symbol=HIST2H2BF Histone H2B
264	IPI00794461	88.64	17	4	3	Y	18804	Tax_Id=9606 Gene_Symbol=HIST1H2BN Histone H2B type 1-N
265	IPI01021744	87.73	15	3	2	Y	21530	Tax_Id=9606 Gene_Symbol=TPM3 cDNA FLJ35393 fis, clone SKNSH2000971, highly similar to TROPOMYOSIN, CYTOSKELETAL TYPE
266	IPI00909961	87.73	14	3	2	Y	23817	Tax_Id=9606 Gene_Symbol=TPM3 cDNA FLJ50720, highly similar to Homo sapiens tropomyosin 3 (TPM3), transcript variant 2, mRNA
267	IPI00796316	86.81	7	3	3	Y	77759	Tax_Id=9606 Gene_Symbol=GSN Uncharacterized protein
268	IPI01015050	86.81	7	3	3	Y	78904	Tax_Id=9606 Gene_Symbol=GSN Uncharacterized protein
269	IPI00646773	86.81	7	3	3	Y	80641	IPI:IPI00646773.2|SWISS-PROT:P06396
270	IPI01009415	86.81	7	3	3	Y	81485	Tax_Id=9606 Gene_Symbol=GSN Uncharacterized protein
271	IPI00647556	86.81	7	3	3	Y	81941	Tax_Id=9606 Gene_Symbol=GSN gelsolin isoform c
272	IPI00026314	86.81	7	3	3	Y	85697	Tax_Id=9606 Gene_Symbol=GSN Isoform 1 of Gelsolin
273	IPI00479145	85.58	7	3	2	Y	44106	Tax_Id=9606 Gene_Symbol=KRT19 Keratin, type I cytoskeletal 19
274	IPI00794644	85.58	9	2	1	N	20843	Tax_Id=9606 Gene_Symbol=KRT19 Uncharacterized protein
275	IPI01019081	84.18	20	2	1	Y	11593	Tax_Id=9606 Gene_Symbol=ACTB Actin-like protein (Fragment)
276	IPI00939526	83.41	7	1	1	N	25903	Tax_Id=9606 Gene_Symbol=HSPA1B;HSPA1A Uncharacterized protein
277	IPI01009562	83.41	3	1	1	N	68396	Tax_Id=9606 Gene_Symbol=HSPA6 cDNA FLJ51847, highly similar to Heat shock 70 kDa protein 6
278	IPI00339269	83.41	2	1	1	N	71028	Tax_Id=9606 Gene_Symbol=HSPA6 Heat shock 70 kDa protein 6
279	IPI00828201	82.71	10	4	4	N	25036	Tax_Id=9606 Gene_Symbol=COL6A2 COL6A2 protein
280	IPI00983601	82.71	5	4	4	N	47451	Tax_Id=9606 Gene_Symbol=COL6A2 Collagen, type VI, alpha 2
281	IPI00304840	82.71	2	4	4	N	108579	Tax_Id=9606 Gene_Symbol=COL6A2 Isoform 2C2 of Collagen alpha-2(VI) chain
282	IPI00241841	82.16	9	4	2	Y	57836	Tax_Id=9606 Gene_Symbol=KRT79 Keratin, type II cytoskeletal 79
283	IPI01024806	81.41	6	1	1	N	24382	Tax_Id=9606 Gene_Symbol=ACTN1 Alpha-actinin 1
284	IPI01026210	81.41	5	1	1	N	28881	Tax_Id=9606 Gene_Symbol=ACTN1 Protein
285	IPI01009456	81.41	4	1	1	N	34320	Tax_Id=9606 Gene_Symbol=ACTN1 34 kDa protein
286	IPI00942539	81.41	4	1	1	N	39002	Tax_Id=9606 Gene_Symbol=ACTN4 39 kDa protein
287	IPI00845465	81.41	2	1	1	N	59579	Tax_Id=9606 Gene_Symbol=ACTN4 Actinin alpha4 isoform
288	IPI01025025	81.41	2	1	1	N	67143	Tax_Id=9606 Gene_Symbol=- cDNA FLJ54432, highly similar to Alpha-actinin-1
289	IPI01015738	81.41	2	1	1	N	79913	Tax_Id=9606 Gene_Symbol=ACTN4 Uncharacterized protein
290	IPI01011340	81.41	1	1	1	N	94826	Tax_Id=9606 Gene_Symbol=ACTN1 cDNA FLJ53313, highly similar to Alpha-actinin-1
291	IPI00909239	81.41	1	1	1	N	102709	Tax_Id=9606 Gene_Symbol=ACTN1 Isoform 2 of Alpha-actinin-1
292	IPI00013508	81.41	1	1	1	N	103058	Tax_Id=9606 Gene_Symbol=ACTN1 Isoform 1 of Alpha-actinin-1
293	IPI00013808	81.41	1	1	1	N	104854	Tax_Id=9606 Gene_Symbol=ACTN4 Alpha-actinin-4
294	IPI00759776	81.41	1	1	1	N	105568	Tax_Id=9606 Gene_Symbol=ACTN1 alpha-actinin-1 isoform a
295	IPI00921118	81.41	1	1	1	N	107141	Tax_Id=9606 Gene_Symbol=ACTN1 Actinin alpha 1 isoform 3
296	IPI01014726	80.07	8	3	3	Y	27398	Tax_Id=9606 Gene_Symbol=CNN1 cDNA, FLJ79305, highly similar to Calponin-1
297	IPI01015371	80.07	7	3	3	Y	31055	Tax_Id=9606 Gene_Symbol=CNN1 cDNA FLJ59763, highly similar to Calponin-1
298	IPI00021264	80.07	7	3	3	Y	33170	Tax_Id=9606 Gene_Symbol=CNN1 Calponin-1
299	IPI00641047	78.97	13	2	2	Y	28954	Tax_Id=9606 Gene_Symbol=GSN Uncharacterized protein
300	IPI00477495	78.33	17	3	2	Y	13944	Tax_Id=9606 Gene_Symbol=H2BFS Histone H2B type F-S
301	IPI00414696	77.96	11	3	2	Y	36006	Tax_Id=9606 Gene_Symbol=HNRNPA2B1 Isoform A2 of Heterogeneous nuclear ribonucleoproteins A2/B1
302	IPI00396378	77.96	10	3	2	Y	37430	Tax_Id=9606 Gene_Symbol=HNRNPA2B1 Isoform B1 of Heterogeneous nuclear ribonucleoproteins A2/B1
303	IPI00879610	77.65	20	1	1	Y	7633	Tax_Id=9606 Gene_Symbol=PDIA3 Uncharacterized protein
304	IPI00796736	77.65	19	1	1	Y	8273	Tax_Id=9606 Gene_Symbol=PDIA3 Uncharacterized protein
305	IPI00893541	77.65	11	1	1	Y	13519	Tax_Id=9606 Gene_Symbol=PDIA3 14 kDa protein
306	IPI00909762	77.25	21	3	1	Y	20043	Tax_Id=9606 Gene_Symbol=TUBA1A cDNA FLJ53765, highly similar to Tubulin alpha chain
307	IPI00893733	77.19	9	1	1	Y	13497	Tax_Id=9606 Gene_Symbol=AGR2 13 kDa protein
308	IPI00893886	77.19	9	1	1	Y	15036	Tax_Id=9606 Gene_Symbol=AGR3 Protein
309	IPI00894341	77.19	7	1	1	Y	18714	Tax_Id=9606 Gene_Symbol=AGR3 Uncharacterized protein
310	IPI00152409	77.19	7	1	1	Y	19171	Tax_Id=9606 Gene_Symbol=AGR3 Anterior gradient protein 3 homolog
311	IPI00942032	77.19	6	1	1	Y	19979	Tax_Id=9606 Gene_Symbol=AGR2 Anterior gradient protein 2 homolog
312	IPI00893607	77.19	6	1	1	Y	21392	Tax_Id=9606 Gene_Symbol=AGR2 Uncharacterized protein
313	IPI00007427	77.19	6	1	1	Y	22238	Tax_Id=9606 Gene_Symbol=AGR2 AGR2
314	IPI00384542	76.75	1	1	1	N	122017	Tax_Id=9606 Gene_Symbol=NID1 Isoform 2 of Nidogen-1
315	IPI00026944	76.75	1	1	1	N	136377	Tax_Id=9606 Gene_Symbol=NID1 Isoform 1 of Nidogen-1
316	IPI00383581	75.6	3	3	2	Y	112926	Tax_Id=9606 Gene_Symbol=GANAB cDNA FLJ61290, highly similar to Neutral alpha-glucosidase AB
317	IPI00794777	73.43	13	1	1	Y	15138	Tax_Id=9606 Gene_Symbol=PRDX2 Uncharacterized protein
318	IPI00644531	72.51	6	1	1	Y	21086	Tax_Id=9606 Gene_Symbol=TAGLN2 21 kDa protein
319	IPI00947530	72.13	12	1	1	Y	12886	Tax_Id=9606 Gene_Symbol=TAGLN3 Uncharacterized protein
320	IPI00005981	72.13	7	1	1	Y	22473	Tax_Id=9606 Gene_Symbo...
321	IPI00220301	69.94	10	2	2	Y	25035	Tax_Id=9606 Gene_Symbol=PRDX6 Peroxiredoxin-6
322	IPI00328113	69.91	2	4	4	Y	312237	Tax_Id=9606 Gene_Symbol=FBN1 Fibrillin-1
323	IPI00911004	69.9	6	1	1	Y	24534	Tax_Id=9606 Gene_Symbol=P4HB cDNA FLJ59939, highly similar to Protein disulfide-isomerase
324	IPI00878551	69.9	3	1	1	Y	51253	Tax_Id=9606 Gene_Symbol=P4HB cDNA FLJ59430, highly similar to Protein disulfide-isomerase
325	IPI00010796	69.9	3	1	1	Y	57116	Tax_Id=9606 Gene_Symbol=P4HB Protein disulfide-isomerase
326	IPI00657767	69.46	7	2	2	Y	33038	Tax_Id=9606 Gene_Symbol=FLNA FLNA protein (Fragment)
327	IPI00910863	69.46	3	2	2	Y	71823	Tax_Id=9606 Gene_Symbol=FLNA cDNA FLJ57890, highly similar to Filamin-A
328	IPI00552416	69.46	3	2	2	Y	82524	Tax_Id=9606 Gene_Symbol=FLNA Uncharacterized protein
329	IPI00004573	69.37	3	1	1	N	83284	Tax_Id=9606 Gene_Symbol=PIGR Polymeric immunoglobulin receptor
330	IPI00011454	69.23	3	2	2	N	109438	Tax_Id=9606 Gene_Symbol=GANAB Isoform 2 of Neutral alpha-glucosidase AB
331	IPI01024873	69.07	13	1	1	Y	13583	Tax_Id=9606 Gene_Symbol=TUBB3 14 kDa protein
332	IPI01025600	69.07	10	1	1	Y	16432	Tax_Id=9606 Gene_Symbol=TUBB3 16 kDa protein
333	IPI01024745	69.07	9	1	1	Y	18288	Tax_Id=9606 Gene_Symbol=TUBB3 18 kDa protein
334	IPI00719622	68.03	42	2	2	Y	7841	Tax_Id=9606 Gene_Symbol=RPS28 40S ribosomal protein S28
335	IPI00974374	67.85	31	1	1	Y	6178	Tax_Id=9606 Gene_Symbol=PPIA Uncharacterized protein
336	IPI00956104	67.85	18	1	1	Y	10737	Tax_Id=9606 Gene_Symbol=- Peptidylprolyl isomerase A-like, isoform CRA_a
337	IPI01025684	67.66	21	1	1	Y	8912	Tax_Id=9606 Gene_Symbol=CALM3;CALM2;CALM1 9 kDa protein
338	IPI01025362	67.66	16	1	1	Y	11119	Tax_Id=9606 Gene_Symbol=CALM3;CALM2;CALM1 11 kDa protein
339	IPI00945782	67.66	14	1	1	Y	12876	Tax_Id=9606 Gene_Symbol=CALM3;CALM2;CALM1 Uncharacterized protein
340	IPI00386621	67.66	11	1	1	Y	16507	Tax_Id=9606 Gene_Symbol=CALM3;CALM2;CALM1 CALM3 protein
341	IPI00075248	67.66	11	1	1	Y	16838	IPI:IPI00075248.11|SWISS-PROT:P62158
342	IPI00794543	67.66	11	1	1	Y	16913	Tax_Id=9606 Gene_Symbol=CALM3;CALM2;CALM1 cDNA FLJ75174, highly similar to Homo sapiens calmodulin 1 (phosphorylase kinase, delta), mRNA
343	IPI00916600	67.66	8	1	1	Y	21689	Tax_Id=9606 Gene_Symbol=CALM3;CALM2;CALM1 Uncharacterized protein
344	IPI00927825	67.56	3	2	2	Y	65394	Tax_Id=9606 Gene_Symbol=FLNA Uncharacterized protein
345	IPI00794728	67.38	35	2	2	Y	6527	Tax_Id=9606 Gene_Symbol=NME1;NME2;NME1-NME2 Uncharacterized protein
346	IPI00790982	67.38	26	2	2	Y	9371	Tax_Id=9606 Gene_Symbol=NME1;NME2;NME1-NME2 Uncharacterized protein
347	IPI00797082	67.38	26	2	2	Y	9583	Tax_Id=9606 Gene_Symbol=NME1;NME2;NME1-NME2 nucleoside diphosphate kinase B isoform b
348	IPI01014620	67.38	15	2	2	Y	15261	Tax_Id=9606 Gene_Symbol=NME1;NME2;NME1-NME2 Uncharacterized protein
349	IPI00026260	67.38	14	2	2	Y	17298	IPI:IPI00026260.1|SWISS-PROT:P22392
350	IPI00012048	67.38	14	2	2	Y	17149	Tax_Id=9606 Gene_Symbol=NME1;NME2;NME1-NME2 Isoform 1 of Nucleoside diphosphate kinase A
351	IPI00375531	67.38	12	2	2	Y	19654	Tax_Id=9606 Gene_Symbol=NME1;NME2;NME1-NME2 Isoform 2 of Nucleoside diphosphate kinase A
352	IPI00795292	67.38	8	2	2	Y	30137	Tax_Id=9606 Gene_Symbol=NME1;NME2;NME1-NME2 Isoform 3 of Nucleoside diphosphate kinase B
353	IPI00604590	67.38	7	2	2	Y	32642	Tax_Id=9606 Gene_Symbol=NME1;NME2;NME1-NME2 Nucleoside diphosphate kinase
354	IPI00966258	66.88	9	2	2	Y	23175	Tax_Id=9606 Gene_Symbol=UCHL1 Uncharacterized protein
355	IPI00018352	66.88	8	2	2	Y	24824	Tax_Id=9606 Gene_Symbol=UCHL1 Ubiquitin carboxyl-terminal hydrolase isozyme L1
356	IPI00910350	66.09	5	1	1	Y	26582	Tax_Id=9606 Gene_Symbol=MAPRE1 cDNA FLJ52068, highly similar to Microtubule-associated protein RP/EB family member 1
357	IPI00017596	66.09	5	1	1	Y	29999	Tax_Id=9606 Gene_Symbol=MAPRE1 Microtubule-associated protein RP/EB family member 1
358	IPI00296922	66.02	1	1	1	N	195980	Tax_Id=9606 Gene_Symbol=LAMB2 Laminin subunit beta-2
359	IPI00743203	66.02	1	1	1	N	196157	Tax_Id=9606 Gene_Symbol=LAMB2 Similar to S-laminin
360	IPI00022774	65.86	4	2	2	Y	89322	Tax_Id=9606 Gene_Symbol=VCP Transitional endoplasmic reticulum ATPase
361	IPI00639945	65.26	12	3	3	Y	18334	Tax_Id=9606 Gene_Symbol=PRDX4 Protein
362	IPI00647280	65.26	7	3	3	Y	29353	Tax_Id=9606 Gene_Symbol=PRDX4 Uncharacterized protein
363	IPI00011937	65.26	7	3	3	Y	30540	Tax_Id=9606 Gene_Symbol=PRDX4 Peroxiredoxin-4
364	IPI00926763	62.85	17	2	1	Y	16005	Tax_Id=9606 Gene_Symbol=CALD1 Uncharacterized protein
365	IPI00853068	62.46	18	2	2	Y	11948	Tax_Id=9606 Gene_Symbol=HBA2;HBA1 Hemoglobin alpha-2
366	IPI00641229	61.92	3	3	3	Y	36526	Tax_Id=9606 Gene_Symbol=IGHA2 Ig alpha-2 chain C region
367	IPI00940245	61.92	2	3	3	Y	44786	Tax_Id=9606 Gene_Symbol=IGHA2 Immunoglobulin heavy chain variant (Fragment)
368	IPI00784950	61.92	2	3	3	Y	51639	Tax_Id=9606 Gene_Symbol=IGHA2 Putative uncharacterized protein DKFZp686L19235
369	IPI00785067	61.92	2	3	3	Y	51998	Tax_Id=9606 Gene_Symbol=IGHA2 IGH@ protein
370	IPI00784758	61.92	2	3	3	Y	52235	Tax_Id=9606 Gene_Symbol=IGHA2 Putative uncharacterized protein DKFZp686M08189
371	IPI00784830	61.92	2	3	3	Y	52875	Tax_Id=9606 Gene_Symbol=IGHA2 cDNA FLJ41981 fis, clone SMINT2011888, highly similar to Protein Tro alpha1 H,myeloma
372	IPI00642017	61.92	2	3	3	Y	53776	Tax_Id=9606 Gene_Symbol=IGHA2 Putative uncharacterized protein DKFZp686C02218 (Fragment)
373	IPI00449920	61.92	2	3	3	Y	53224	Tax_Id=9606 Gene_Symbol=IGHA1 cDNA FLJ90170 fis, clone MAMMA1000370, highly similar to Ig alpha-1 chain C region
374	IPI00386879	61.92	2	3	3	Y	53088	Tax_Id=9606 Gene_Symbol=IGHA1 cDNA FLJ14473 fis, clone MAMMA1001080, highly similar to Homo sapiens SNC73 protein (SNC73) mRNA
375	IPI00647704	61.92	2	3	3	Y	53321	Tax_Id=9606 Gene_Symbol=IGHA1 cDNA FLJ41552 fis, clone COLON2004478, highly similar to Protein Tro alpha1 H,myeloma
376	IPI00978930	61.92	2	3	3	Y	53599	Tax_Id=9606 Gene_Symbol=ADD2;LOC440354 Ig alpha-1 chain C region
377	IPI00386524	61.92	2	3	3	Y	53533	Tax_Id=9606 Gene_Symbol=IGHA1 CDNA FLJ25298 fis, clone STM07683, highly similar to Protein Tro alpha1 H,myeloma
378	IPI00383164	61.92	2	3	3	Y	53666	Tax_Id=9606 Gene_Symbol=IGHA1 SNC66 protein
379	IPI01015266	61.92	2	3	3	Y	54125	Tax_Id=9606 Gene_Symbol=IGHA2 Putative uncharacterized protein DKFZp686O16217 (Fragment)
380	IPI00423461	61.92	2	3	3	Y	54160	Tax_Id=9606 Gene_Symbol=IGHA2 Putative uncharacterized protein DKFZp686C02220 (Fragment)
381	IPI00423460	61.92	2	3	3	Y	54389	Tax_Id=9606 Gene_Symbol=IGHA1 Putative uncharacterized protein DKFZp686G21220 (Fragment)
382	IPI00426060	61.92	2	3	3	Y	54460	Tax_Id=9606 Gene_Symbol=IGHA1 Putative uncharacterized protein DKFZp686J11235 (Fragment)
383	IPI00423462	61.92	2	3	3	Y	56424	Tax_Id=9606 Gene_Symbol=IGHA1 Putative uncharacterized protein DKFZp686K18196 (Fragment)
384	IPI00965965	61.49	24	2	2	N	10155	Tax_Id=9606 Gene_Symbol=TMEM189;UBE2V1;TMEM189-UBE2V1 Uncharacterized protein
385	IPI00030962	61.49	12	2	2	N	19307	Tax_Id=9606 Gene_Symbol=TMEM189;UBE2V1;TMEM189-UBE2V1 Isoform 5 of Ubiquitin-conjugating enzyme E2 variant...
386	IPI00447356	61.49	12	2	2	N	19228	Tax_Id=9606 Gene_Symbol=TMEM189;UBE2V1;TMEM189-UBE2V1 Isoform 2 of Ubiquitin-conjugating enzyme E2 variant 1
387	IPI01015099	61.49	27	2	2	Y	12017	Tax_Id=9606 Gene_Symbol=UBE2V2 12 kDa protein
388	IPI00019600	61.49	19	2	2	Y	16363	Tax_Id=9606 Gene_Symbol=UBE2V2 Ubiquitin-conjugating enzyme E2 variant 2
389	IPI01012867	61.49	10	1	1	N	11290	Tax_Id=9606 Gene_Symbol=UBE2V2 Protein
390	IPI00514724	61.49	10	1	1	N	11765	Tax_Id=9606 Gene_Symbol=TMEM189;UBE2V1;TMEM189-UBE2V1 Uncharacterized protein
391	IPI00472498	61.49	7	1	1	N	16495	Tax_Id=9606 Gene_Symbol=TMEM189;UBE2V1;TMEM189-UBE2V1 Isoform 3 of Ubiquitin-conjugating enzyme E2 variant 1
392	IPI01015529	61.49	6	1	1	N	16879	Tax_Id=9606 Gene_Symbol=UBE2V2 Protein
393	IPI00019599	61.49	3	1	1	N	42209	Tax_Id=9606 Gene_Symbol=TMEM189;UBE2V1;TMEM189-UBE2V1 Isoform 1 of Ubiquitin-conjugating enzyme E2 variant 1
394	IPI00909366	61.31	10	2	2	N	24541	Tax_Id=9606 Gene_Symbol=MYL6B cDNA FLJ60058, highly similar to Myosin light chain 1, slow-twitch muscle A isoform
395	IPI01021460	61.31	10	1	1	N	14436	Tax_Id=9606 Gene_Symbol=MYL6 Uncharacterized protein
396	IPI01021943	61.31	7	1	1	N	19036	Tax_Id=9606 Gene_Symbol=MYL6B Uncharacterized protein
397	IPI00027255	61.31	6	1	1	N	22764	Tax_Id=9606 Gene_Symbol=MYL6B Myosin light chain 6B
398	IPI00877618	60.87	7	1	1	N	24982	Tax_Id=9606 Gene_Symbol=MPST Uncharacterized protein
399	IPI00165360	60.87	5	1	1	N	33178	IPI:IPI00165360.5|SWISS-PROT:P25325
400	IPI00746782	60.87	5	1	1	N	34751	Tax_Id=9606 Gene_Symbol=MPST 3-mercaptopyruvate sulfurtransferase variant (Fragment)
401	IPI00910977	60.87	5	1	1	N	35250	Tax_Id=9606 Gene_Symbol=MPST 3-mercaptopyruvate sulfurtransferase isoform 1
402	IPI00014263	59.77	9	1	1	N	27385	Tax_Id=9606 Gene_Symbol=EIF4H Isoform Long of Eukaryotic translation initiation factor 4H
403	IPI01022141	59.23	3	1	1	Y	58302	Tax_Id=9606 Gene_Symbol=HSPA1L Uncharacterized protein
404	IPI01021676	59.23	3	1	1	Y	58333	Tax_Id=9606 Gene_Symbol=HSPA1L cDNA FLJ56517, highly similar to Heat shock 70 kDa protein 1L
405	IPI00830052	59.23	3	1	1	Y	64378	Tax_Id=9606 Gene_Symbol=HSPA1L Uncharacterized protein
406	IPI00939442	59.23	2	1	1	Y	70375	Tax_Id=9606 Gene_Symbol=HSPA1L Heat shock 70 kDa protein 1-like
407	IPI00893099	59.23	2	1	1	Y	70404	Tax_Id=9606 Gene_Symbol=HSPA1L Uncharacterized protein
408	IPI00643152	59.23	2	1	1	Y	77562	Tax_Id=9606 Gene_Symbol=HSPA1L cDNA FLJ56386, highly similar to Heat shock 70 kDa protein 1L
409	IPI00981926	59.21	10	1	1	Y	17916	Tax_Id=9606 Gene_Symbol=HSPA8 Uncharacterized protein
410	IPI00980651	59.21	9	1	1	Y	18727	Tax_Id=9606 Gene_Symbol=HSPA8 Uncharacterized protein
411	IPI00981268	59.21	9	1	1	Y	19466	Tax_Id=9606 Gene_Symbol=HSPA8 Uncharacterized protein
412	IPI00981429	59.21	9	1	1	Y	20013	Tax_Id=9606 Gene_Symbol=HSPA8 Uncharacterized protein
413	IPI01008803	59.21	9	1	1	Y	20369	Tax_Id=9606 Gene_Symbol=HSPA8 Uncharacterized protein
414	IPI00910870	59.21	8	1	1	Y	23081	Tax_Id=9606 Gene_Symbol=HSPA8 cDNA FLJ59163, highly similar to Heat shock cognate 71 kDa protein
415	IPI00984226	59.21	5	1	1	Y	34819	Tax_Id=9606 Gene_Symbol=HSPA8 Uncharacterized protein
416	IPI00037070	59.21	3	1	1	Y	53575	Tax_Id=9606 Gene_Symbol=HSPA8 Uncharacterized protein
417	IPI00003865	59.21	2	1	1	Y	70898	Tax_Id=9606 Gene_Symbol=HSP...
418	IPI00647695	59.01	10	2	2	Y	29623	IPI:IPI00647695.3|TREMBL:A2ABS5;E9PBN5
419	IPI00646524	59.01	7	1	1	Y	23512	Tax_Id=9606 Gene_Symbol=DDAH2 Uncharacterized protein
420	IPI00645821	59.01	7	1	1	Y	23569	IPI:IPI00645821.2|TREMBL:Q5SSV3
421	IPI00797462	59.01	6	1	1	Y	24640	IPI:IPI00797462.1|TREMBL:Q5SRR8
422	IPI00000760	59.01	5	1	1	Y	29644	IPI:IPI00000760.1|SWISS-PROT:O95865
423	IPI00909344	58.6	17	3	3	Y	38130	Tax_Id=9606 Gene_Symbol=KHSRP cDNA FLJ51330, highly similar to Far upstream element-binding protein 2
424	IPI00855957	58.6	7	3	3	Y	72897	Tax_Id=9606 Gene_Symbol=KHSRP Isoform 2 of Far upstream element-binding protein 2
425	IPI00479786	58.6	7	3	3	Y	73115	Tax_Id=9606 Gene_Symbol=KHSRP Isoform 1 of Far upstream element-binding protein 2
426	IPI00916763	58.28	13	2	2	Y	10690	Tax_Id=9606 Gene_Symbol=HSPE1 Uncharacterized protein
427	IPI00220362	58.28	13	2	2	Y	10932	Tax_Id=9606 Gene_Symbol=HSPE1 10 kDa heat shock protein, mitochondrial
428	IPI00983633	58.28	5	2	2	Y	29737	Tax_Id=9606 Gene_Symbol=HSPE1-PHOCN HSPE1-MOBKL3 protein
429	IPI00376200	56.97	8	2	2	Y	25587	Tax_Id=9606 Gene_Symbol=TPSD1 Isoform 2 of Tryptase delta
430	IPI01018188	56.97	8	2	2	Y	25874	Tax_Id=9606 Gene_Symbol=TPSAB1 Mast cell tryptase beta III
431	IPI00953339	56.97	8	2	2	Y	25817	Tax_Id=9606 Gene_Symbol=TPSD1 Uncharacterized protein
432	IPI00419573	56.97	8	2	2	Y	26584	Tax_Id=9606 Gene_Symbol=TPSD1 Isoform 1 of Tryptase delta
433	IPI00003362	55.97	4	3	2	Y	72333	Tax_Id=9606 Gene_Symbol=HSPA5 78 kDa glucose-regulated protein
434	IPI01015016	54.89	20	1	1	Y	6876	Tax_Id=9606 Gene_Symbol=UBC Uncharacterized protein
435	IPI00967416	54.83	13	2	2	N	24698	Tax_Id=9606 Gene_Symbol=ANXA5 Uncharacterized protein
436	IPI00964635	54.83	11	2	2	N	30863	Tax_Id=9606 Gene_Symbol=ANXA5 Uncharacterized protein
437	IPI00329801	54.83	9	2	2	N	35937	Tax_Id=9606 Gene_Symbol=ANXA5 Annexin A5
438	IPI00965294	54.83	54	1	1	N	3713	Tax_Id=9606 Gene_Symbol=ANXA5 Uncharacterized protein
439	IPI00964365	54.83	12	1	1	N	18224	Tax_Id=9606 Gene_Symbol=ANXA5 Uncharacterized protein
440	IPI00552858	54.55	5	1	1	N	29859	Tax_Id=9606 Gene_Symbol=FLNA Filamin A, alpha
441	IPI01020679	54.45	23	2	2	N	12157	Tax_Id=9606 Gene_Symbol=KRT5 Uncharacterized protein
442	IPI00020986	53.73	2	1	1	N	38429	Tax_Id=9606 Gene_Symbol=LUM Lumican
443	IPI00910553	52.06	11	1	1	Y	11161	Tax_Id=9606 Gene_Symbol=PRDX6 cDNA FLJ51310, moderately similar to Peroxiredoxin-6
444	IPI00477227	49.93	2	1	1	N	56866	Tax_Id=9606 Gene_Symbol=KRT78 Isoform 1 of Keratin, type II cytoskeletal 78
445	IPI00514669	49.55	24	1	1	Y	9381	Tax_Id=9606 Gene_Symbol=SH3BGRL3 Uncharacterized protein
446	IPI00746352	49.55	23	1	1	Y	10438	Tax_Id=9606 Gene_Symbol=SH3BGRL3 SH3 domain-binding glutamic acid-rich-like protein 3
447	IPI00010402	49.55	9	1	1	Y	23838	Tax_Id=9606 Gene_Symbol=SH3BGRL3 Putative uncharacterized protein
448	IPI00955848	49.55	8	1	1	Y	26819	Tax_Id=9606 Gene_Symbol=- SH3 domain binding glutamic acid-rich protein like 3, isoform CRA_a (Fragment)
449	IPI00843996	49.15	7	1	1	N	14203	Tax_Id=9606 Gene_Symbol=SRSF3 cDNA FLJ52832, highly similar to Splicing factor, arginine/serine-rich 3
450	IPI00010204	49.15	5	1	1	N	19330	Tax_Id=9606 Gene_Symbol=SRSF3 Serine/arginine-rich splicing factor 3
451	IPI00431645	48.48	3	1	1	N	31408	Tax_Id=9606 Gene_Symbol=HPR 31 kDa protein
452	IPI00478493	48.48	3	1	1	N	38452	Tax_Id=9606 Gene_Symbol=HP;HPR haptoglobin isoform 2 preproprotein
453	IPI00942787	48.48	2	1	1	N	42180	Tax_Id=9606 Gene_Symbol=HPR 42 kDa protein
454	IPI00641737	48.48	2	1	1	N	45205	Tax_Id=9606 Gene_Symbol=HP;HPR Haptoglobin
455	IPI00166293	48.26	13	3	2	Y	13908	Tax_Id=9606 Gene_Symbol=HIST3H2BB Histone H2B type 3-B
456	IPI00930570	48.26	13	3	2	Y	13996	Tax_Id=9606 Gene_Symbol=HIST1H2BD Histone H2B
457	IPI00922908	48.18	4	1	1	N	24625	Tax_Id=9606 Gene_Symbol=- cDNA FLJ51252, highly similar to Collagen alpha-1(I) chain
458	IPI00010555	48.13	3	3	3	Y	127276	Tax_Id=9606 Gene_Symbol=SORBS1 Isoform 2 of Sorbin and SH3 domain-containing protein 1
459	IPI00807389	48.13	3	3	3	Y	139400	Tax_Id=9606 Gene_Symbol=SORBS1 Isoform 11 of Sorbin and SH3 domain-containing protein 1
460	IPI00306791	48.13	3	3	3	Y	143860	Tax_Id=9606 Gene_Symbol=SORBS1 Similar to Sorbin and SH3 domain containing 1 isoform 1
461	IPI00383430	48.13	4	2	2	Y	68745	Tax_Id=9606 Gene_Symbol=SORBS1 Isoform 7 of Sorbin and SH3 domain-containing protein 1
462	IPI00186452	48.13	3	2	2	Y	90218	Tax_Id=9606 Gene_Symbol=SORBS1 Isoform 10 of Sorbin and SH3 domain-containing protein 1
463	IPI00922621	48.13	3	2	2	Y	93289	Tax_Id=9606 Gene_Symbol=- cDNA FLJ54732, moderately similar to Sorbin and SH3 domain-containing protein 1
464	IPI00010554	48.13	3	2	2	Y	101082	Tax_Id=9606 Gene_Symbol=SORBS1 Isoform 3 of Sorbin and SH3 domain-containing protein 1
465	IPI00454951	48.13	2	2	2	Y	111791	Tax_Id=9606 Gene_Symbol=SORBS1 Isoform 5 of Sorbin and SH3 domain-containing protein 1
466	IPI00426075	48.13	3	1	1	Y	62436	Tax_Id=9606 Gene_Symbol=SORBS1 Putative uncharacterized protein DKFZp686N08224
467	IPI00454950	48.13	2	1	1	Y	76596	Tax_Id=9606 Gene_Symbol=SORBS1 Isoform 4 of Sorbin and SH3 domain-containing protein 1
468	IPI00654848	48.13	2	1	1	Y	83913	Tax_Id=9606 Gene_Symbol=SORBS1 cDNA FLJ60072, highly similar to Homo sapiens sorbin and SH3 domain containing 1 (SORBS1), transcript variant 6, mRNA
469	IPI00002491	48.13	2	1	1	Y	87199	Tax_Id=9606 Gene_Symbol=SORBS1 Isoform 9 of Sorbin and SH3 domain-containing protein 1
470	IPI00064591	48.13	2	1	1	Y	91055	Tax_Id=9606 Gene_Symbol=SORBS1 Isoform 8 of Sorbin and SH3 domain-containing protein 1
471	IPI00334908	48.13	2	1	1	Y	95036	Tax_Id=9606 Gene_Symbol=SORBS1 Isoform 6 of Sorbin and SH3 domain-containing protein 1
472	IPI01018230	48.13	1	1	1	Y	143741	Tax_Id=9606 Gene_Symbol=SORBS1 Isoform 12 of Sorbin and SH3 domain-containing protein 1
473	IPI01011952	48	1	1	1	N	100938	Tax_Id=9606 Gene_Symbol=VCL cDNA FLJ59659, highly similar to Vinculin
474	IPI01014113	48	1	1	1	N	110262	Tax_Id=9606 Gene_Symbol=VCL Uncharacterized protein
475	IPI01022070	47.74	2	1	1	N	43774	Tax_Id=9606 Gene_Symbol=KRT18 Uncharacterized protein
476	IPI00554788	47.74	2	1	1	N	48058	Tax_Id=9606 Gene_Symbol=KRT18 Keratin, type I cytoskeletal 18
477	IPI00027547	47.32	13	1	1	N	11284	Tax_Id=9606 Gene_Symbol=DCD Dermcidin
478	IPI00556391	47.29	17	1	1	N	11476	Tax_Id=9606 Gene_Symbol=- Actin-like protein (Fragment)
479	IPI00967062	47.19	14	1	1	N	6336	Tax_Id=9606 Gene_Symbol=UCHL1 Uncharacterized protein
480	IPI00964945	47.19	5	1	1	N	17361	Tax_Id=9606 Gene_Symbol=UCHL1 Uncharacterized protein
481	IPI00967971	47.19	4	1	1	N	23862	Tax_Id=9606 Gene_Symbol=UCHL1 Uncharacterized protein
482	IPI00967387	47.19	3	1	1	N	26840	Tax_Id=9606 Gene_Symbol=UCHL1 Uncharacterized protein
483	IPI00916188	45.74	3	1	1	N	32447	Tax_Id=9606 Gene_Symbol=NCL 32 kDa protein
484	IPI00183526	45.74	2	1	1	N	50951	Tax_Id=9606 Gene_Symbol=NCL Uncharacterized protein
485	IPI00444262	45.74	2	1	1	N	65962	Tax_Id=9606 Gene_Symbol=NCL cDNA FLJ45706 fis, clone FEBRA2028457, highly similar to Nucleolin
486	IPI00604620	45.74	1	1	1	N	76615	Tax_Id=9606 Gene_Symbol=NCL Nucleolin
487	IPI00903112	44.81	1	1	1	N	76753	Tax_Id=9606 Gene_Symbol=LTF cDNA FLJ36533 fis, clone TRACH2004428, hig...
488	IPI00925547	44.81	1	1	1	N	77970	Tax_Id=9606 Gene_Symbol=LTF Uncharacterized protein
489	IPI00298860	44.81	1	1	1	N	78368	Tax_Id=9606 Gene_Symbol=LTF cDNA FLJ78440, highly similar to Human lactoferrin
490	IPI00023704	44.73	2	1	1	Y	65746	Tax_Id=9606 Gene_Symbol=LPP Lipoma-preferred partner
491	IPI00386638	44.01	34	4	4	Y	3779	Tax_Id=9606 Gene_Symbol=TAGLN Transgelin variant 1
492	IPI01012346	43.17	10	2	2	Y	10557	Tax_Id=9606 Gene_Symbol=S100A4 Uncharacterized protein
493	IPI00032313	43.17	9	2	2	Y	11729	Tax_Id=9606 Gene_Sy...
494	IPI00947235	41.98	17	1	1	N	8168	Tax_Id=9606 Gene_Symbol=IGJ Uncharacterized protein
495	IPI00964000	41.98	8	1	1	N	18122	Tax_Id=9606 Gene_Symbol=IGJ Uncharacterized protein
496	IPI00178926	41.98	8	1	1	N	18099	Tax_Id=9606 Gene_Symbol=IGJ Immunoglobulin J chain
497	IPI00964840	41.98	7	1	1	N	19602	Tax_Id=9606 Gene_Symbol=IGJ Uncharacterized protein
498	IPI00292009	41.74	1	1	1	Y	122047	Tax_Id=9606 Gene_Symbol=PALLD Isoform 2 of Palladin
499	IPI00856001	41.74	1	1	1	Y	127826	Tax_Id=9606 Gene_Symbol=PALLD Isoform 5 of Palladin
500	IPI01021398	41.38	9	1	1	Y	9744	Tax_Id=9606 Gene_Symbol=UBE2N Uncharacterized protein
501	IPI01021220	41.38	8	1	1	Y	11983	Tax_Id=9606 Gene_Symbol=UBE2N Uncharacterized protein
502	IPI00003949	41.38	5	1	1	Y	17138	Tax_Id=9606 Gene_Symbol=UBE2N Ubiquitin-conjugating enzyme E2 N
503	IPI01020774	41.38	5	1	1	Y	17665	Tax_Id=9606 Gene_Symbol=UBE2N Uncharacterized protein
504	IPI00376844	41.38	5	1	1	Y	17377	Tax_Id=9606 Gene_Symbol=UBE2NL Putative ubiquitin-conjugating enzyme E2 N-like
505	IPI00921956	41.27	3	1	1	N	39042	Tax_Id=9606 Gene_Symbol=SYNM Isoform 3 of Synemin
506	IPI00299302	41.27	1	1	1	N	140135	Tax_Id=9606 Gene_Symbol=SYNM Isoform 2 of Synemin
507	IPI00299301	41.27	1	1	1	N	172767	Tax_Id=9606 Gene_Symbol=SYNM Isoform 1 of Synemin
508	IPI00375281	41.06	5	3	3	Y	120183	Tax_Id=9606 Gene_Symbol=AKAP13 A-kinase anchor protein 13 isoform 3
509	IPI00829717	41.06	4	3	3	Y	161184	Tax_Id=9606 Gene_Symbol=AKAP13 Isoform 3 of A-kinase anchor protein 13
510	IPI00829774	41.06	2	3	3	Y	305280	Tax_Id=9606 Gene_Symbol=AKAP13 Isoform 4 of A-kinase anchor protein 13
511	IPI00329783	41.06	2	3	3	Y	307550	Tax_Id=9606 Gene_Symbol=AKAP13 Isoform 1 of A-kinase anchor protein 13
512	IPI00872432	41.06	2	3	3	Y	307737	Tax_Id=9606 Gene_Symbol=AKAP13 308 kDa protein
513	IPI00065931	41.06	2	3	3	Y	307845	Tax_Id=9606 Gene_Symbol=AKAP13 Isoform 2 of A-kinase anchor protein 13
514	IPI01009467	40.76	4	1	1	Y	20703	Tax_Id=9606 Gene_Symbol=FBN1 Uncharacterized protein
515	IPI01009156	40.76	1	1	1	Y	124429	Tax_Id=9606 Gene_Symbol=FBN1 Uncharacterized protein
516	IPI00382699	40.45	1	2	2	Y	230287	Tax_Id=9606 Gene_Symbol=FLNB Isoform 5 of Filamin-B
517	IPI00382698	40.45	1	2	2	Y	230785	Tax_Id=9606 Gene_Symbol=FLNB Isoform 4 of Filamin-B
518	IPI00940093	40.45	1	2	2	Y	257548	Tax_Id=9606 Gene_Symbol=FLNB Isoform 7 of Filamin-B
519	IPI00943563	40.45	1	2	2	Y	275666	Tax_Id=9606 Gene_Symbol=FLNB Isoform 2 of Filamin-B
520	IPI00477536	40.45	1	2	2	Y	276936	Tax_Id=9606 Gene_Symbol=FLNB filamin-B isoform 3
521	IPI00289334	40.45	1	2	2	Y	278162	Tax_Id=9606 Gene_Symbol=FLNB Isoform 1 of Filamin-B
522	IPI00900293	40.45	1	2	2	Y	281633	Tax_Id=9606 Gene_Symbol=FLNB filamin-B isoform 1
523	IPI00306322	40.44	9	8	7	Y	167553	Tax_Id=9606 Gene_Symbol=COL4A2 Collagen alpha-2(IV) chain
524	IPI00936857	40.44	9	8	7	Y	168045	Tax_Id=9606 Gene_Symbol=COL4A2 Uncharacterized protein
525	IPI00900324	40.24	3	2	2	Y	117514	Tax_Id=9606 Gene_Symbol=SYNPO2 Isoform 1 of Synaptopodin-2
526	IPI00900276	40.24	3	2	2	Y	119244	Tax_Id=9606 Gene_Symbol=SYNPO2 Isoform 3 of Synaptopodin-2
527	IPI00966171	40.24	3	2	2	Y	125371	Tax_Id=9606 Gene_Symbol=SYNPO2 Protein
528	IPI00173549	40.24	3	2	2	Y	136342	Tax_Id=9606 Gene_Symbol=SYNPO2 Isoform 2 of Synaptopodin-2
529	IPI00657751	39.92	2	2	1	N	87317	Tax_Id=9606 Gene_Symbol=PYGM glycogen phosphorylase, muscle form isoform 2
530	IPI01009320	39.92	2	2	1	N	95904	Tax_Id=9606 Gene_Symbol=PYGM Phosphorylase
531	IPI00218130	39.92	2	2	1	N	97092	Tax_Id=9606 Gene_Symbol=PYGM Glycogen phosphorylase, muscle form
532	IPI00909513	39.92	2	1	1	N	67689	Tax_Id=9606 Gene_Symbol=PYGM Phosphorylase
533	IPI00471928	39.71	2	1	1	Y	54494	Tax_Id=9606 Gene_Symbol=ATP5A1 ATP synthase subunit alpha
534	IPI00908963	39.71	2	1	1	Y	57578	Tax_Id=9606 Gene_Symbol=ATP5A1 ATP synthase subunit alpha
535	IPI00440493	39.71	2	1	1	Y	59751	Tax_Id=9606 Gene_Symbol=ATP5A1 ATP synthase subunit alpha, mitochondrial
536	IPI01018892	39.12	12	1	1	Y	10181	Tax_Id=9606 Gene_Symbol=CFL1 Uncharacterized protein
537	IPI00909841	39.12	10	1	1	Y	12460	Tax_Id=9606 Gene_Symbol=- cDNA FLJ51435, moderately similar to Cofilin-1
538	IPI00979518	39.12	7	1	1	Y	17865	Tax_Id=9606 Gene_Symbol=CFL1 Uncharacterized protein
539	IPI00012011	39.12	7	1	1	Y	18502	Tax_Id=9606 Gene_Symbol=CFL1 Cofilin-1
540	IPI00984795	39.12	5	1	1	Y	22728	Tax_Id=9606 Gene_Symbol=CFL1 Uncharacterized protein
541	IPI00946754	39.01	14	2	2	N	15422	Tax_Id=9606 Gene_Symbol=PRSS1 Protease serine 1
542	IPI00169276	39.01	8	2	2	N	26539	Tax_Id=9606 Gene_Symbol=- Putative trypsin-6
543	IPI00011694	39.01	8	2	2	N	26558	Tax_Id=9606 Gene_Symbol=PRSS1 Trypsin-1
544	IPI00815665	39.01	8	2	2	N	26488	Tax_Id=9606 Gene_Symbol=PRSS1;PRSS2 Trypsin-2
545	IPI00011695	39.01	8	2	2	N	28137	Tax_Id=9606 Gene_Symbol=PRSS3 Protease serine 2 isoform B
546	IPI00945846	39.01	8	2	2	N	28123	Tax_Id=9606 Gene_Symbol=PRSS1 Uncharacterized protein
547	IPI00939560	38.54	3	1	1	N	36178	Tax_Id=9606 Gene_Symbol=TXNDC5;MUTED;MUTED-TXNDC5 thioredoxin domain-containing protein 5 isoform 3
548	IPI01012126	38.54	2	1	1	N	43669	Tax_Id=9606 Gene_Symbol=TXNDC5;MUTED;MUTED-TXNDC5 Thioredoxin domain containing protein
549	IPI00171438	38.54	2	1	1	N	47629	Tax_Id=9606 Gene_Symbol=TXNDC5;MUTED;MUTED-TXNDC5 Thioredoxin domain-containing protein 5
550	IPI00784869	38.44	0	4	1	N	514845	Tax_Id=9606 Gene_Symbol=DNAH10 Isoform 1 of Dynein heavy chain 10, axonemal
551	IPI00243338	36.78	3	2	2	N	33341	Tax_Id=9606 Gene_Symbol=KRT23 cDNA, FLJ95443, highly similar to Homo sapiens keratin 23 (histone deacetylase inducible) (KRT23), transcript variant 2, mRNA
552	IPI00304458	36.78	2	2	2	N	48131	Tax_Id=9606 Gene_Symbol=KRT23 Keratin, type I cytoskeletal 23
553	IPI01010474	36.6	1	16	13	Y	3713611	Tax_Id=9606 Gene_Symbol=TTN Titin
554	IPI00940872	36.6	1	16	13	Y	3881151	Tax_Id=9606 Gene_Symbol=TTN Titin, isoform CRA_a
555	IPI01018745	36.6	1	15	12	Y	3713499	Tax_Id=9606 Gene_Symbol=TTN titin isoform N2-A
556	IPI00759637	36.6	1	15	12	Y	3716096	Tax_Id=9606 Gene_Symbol=TTN Isoform 4 of Titin
557	IPI00179357	36.6	1	15	12	Y	3734713	Tax_Id=9606 Gene_Symbol=TTN Isoform 7 of Titin
558	IPI00023283	36.6	1	15	12	Y	3805759	Tax_Id=9606 Gene_Symbol=TTN Isoform 2 of Titin
559	IPI00759754	36.6	1	15	12	Y	3816081	Tax_Id=9606 Gene_Symbol=TTN Isoform 1 of Titin
560	IPI00759542	36.6	1	15	12	Y	3829767	Tax_Id=9606 Gene_Symbol=TTN Isoform 8 of Titin
561	IPI00983321	36.29	2	2	1	N	102885	Tax_Id=9606 Gene_Symbol=C6orf174 Uncharacterized protein
562	IPI00647205	36.29	2	2	1	N	103199	Tax_Id=9606 Gene_Symbol=C6orf174 Uncharacterized protein C6orf174
563	IPI01022815	36.12	18	2	1	N	14282	Tax_Id=9606 Gene_Symbol=KRT5 Uncharacterized protein
564	IPI00552689	36.02	12	2	1	N	20036	Tax_Id=9606 Gene_Symbol=VIM Vimentin
565	IPI00006690	35.24	3	2	2	Y	81040	Tax_Id=9606 Gene_Symbol=EPX Eosinophil peroxidase
566	IPI00975638	35.11	9	1	1	Y	10575	Tax_Id=9606 Gene_Symbol=CTSB Uncharacterized protein
567	IPI00982206	35.11	9	1	1	Y	10703	Tax_Id=9606 Gene_Symbol=CTSB Uncharacterized protein
568	IPI00982855	35.11	8	1	1	Y	11375	Tax_Id=9606 Gene_Symbol=CTSB Uncharacterized protein
569	IPI00981711	35.11	8	1	1	Y	11760	Tax_Id=9606 Gene_Symbol=CTSB Uncharacterized protein
570	IPI00978088	35.11	7	1	1	Y	12682	Tax_Id=9606 Gene_Symbol=CTSB Uncharacterized protein
571	IPI00983480	35.11	6	1	1	Y	15377	Tax_Id=9606 Gene_Symbol=CTSB Uncharacterized protein
572	IPI00983365	35.11	6	1	1	Y	16082	Tax_Id=9606 Gene_Symbol=CTSB Uncharacterized protein
573	IPI00984553	35.11	5	1	1	Y	16633	Tax_Id=9606 Gene_Symbol=CTSB Uncharacterized protein
574	IPI00978678	35.11	5	1	1	Y	18515	Tax_Id=9606 Gene_Symbol=CTSB Uncharacterized protein
575	IPI00976781	35.11	5	1	1	Y	18929	Tax_Id=9606 Gene_Symbol=CTSB Uncharacterized protein
576	IPI01011636	35.11	5	1	1	Y	19478	Tax_Id=9606 Gene_Symbol=CTSB Uncharacterized protein
577	IPI00909303	35.11	3	1	1	Y	30768	Tax_Id=9606 Gene_Symbol=CTSB cDNA FLJ58073, moderately similar to Cathepsin B
578	IPI00295741	35.11	2	1	1	Y	37822	IPI:IPI00295741.4|SWISS-PROT:P07858
579	IPI00550834	34.8	1	4	2	Y	325232	Tax_Id=9606 Gene_Symbol=WDFY4 Isoform 5 of WD repeat- and FYVE domain-containing protein 4
580	IPI00641442	34.8	1	4	2	Y	352667	Tax_Id=9606 Gene_Symbol=WDFY4 Isoform 4 of WD repeat- and FYVE domain-containing protein 4
581	IPI00887548	34.8	1	4	2	Y	353610	Tax_Id=9606 Gene_Symbol=WDFY4 Isoform 1 of WD repeat- and FYVE domain-containing protein 4
582	IPI01022848	34.09	11	1	1	Y	9726	Tax_Id=9606 Gene_Symbol=ARPC3 Uncharacterized protein
583	IPI00796102	34.09	9	1	1	Y	11546	Tax_Id=9606 Gene_Symbol=ARPC3 Uncharacterized protein
584	IPI00911088	34.09	5	1	1	Y	19061	Tax_Id=9606 Gene_Symbol=ARPC3 cDNA FLJ51245, highly similar to Actin-related protein 2/3 complex subunit 3
585	IPI00005162	34.09	5	1	1	Y	20547	Tax_Id=9606 Gene_Symbol=ARPC3 Actin-related protein 2/3 complex subunit 3
586	IPI00658131	33.9	2	1	1	N	63113	Tax_Id=9606 Gene_Symbol=RFX5 Regulatory factor X, 5
587	IPI00643370	33.71	13	2	1	Y	18603	Tax_Id=9606 Gene_Symbol=TPM3 Uncharacterized protein
588	IPI00816687	33.37	9	1	1	Y	19550	Tax_Id=9606 Gene_Symbol=FGB FGB protein (Fragment)
589	IPI00298497	33.37	3	1	1	Y	55928	Tax_Id=9606 Gene_Symbol=FGB Fibrinogen beta chain
590	IPI00759806	33.21	2	1	1	Y	36928	Tax_Id=9606 Gene_Symbol=ENO1 Isoform MBP-1 of Alpha-enolase
591	IPI00465248	33.21	2	1	1	Y	47169	Tax_Id=9606 Gene_Symbol=ENO1 Isoform alpha-enolase of Alpha-enolase
592	IPI00167217	33.1	6	2	1	Y	24771	Tax_Id=9606 Gene_Symbol=NOTCH2 CDNA FLJ25506 fis, clone CBR05185
593	IPI00009143	33.02	5	4	2	Y	101718	Tax_Id=9606 Gene_Symbol=ADAMTS5 A disintegrin and metalloproteinase with thrombospondin motifs 5
594	IPI00647133	31.66	1	2	1	Y	191421	Tax_Id=9606 Gene_Symbol=ARID2 Isoform 3 of AT-rich interactive domain-containing protein 2
595	IPI00470537	31.66	1	2	1	Y	197390	Tax_Id=9606 Gene_Symbol=ARID2 Isoform 1 of AT-rich interactive domain-containing protein 2
596	IPI00397955	31.45	3	4	3	N	159890	Tax_Id=9606 Gene_Symbol=FGD5 Isoform 1 of FYVE, RhoGEF and PH domain-containing protein 5
597	IPI00746251	30.93	7	2	1	Y	18018	Tax_Id=9606 Gene_Symbol=HIST2H2BD Putative histone H2B type 2-D
598	IPI00454695	30.93	6	2	1	Y	21472	Tax_Id=9606 Gene_Symbol=- Putative histone H2B type 2-C
599	IPI00965543	30.92	8	6	5	Y	167752	Tax_Id=9606 Gene_Symbol=COL11A1 collagen alpha-1(XI) chain isoform C preproprotein
600	IPI00295575	30.92	7	6	5	Y	181064	Tax_Id=9606 Gene_Symbol=COL11A1 Isoform A of Collagen alpha-1(XI) chain
601	IPI00878349	30.63	1	2	1	Y	240763	Tax_Id=9606 Gene_Symbol=CABIN1 calcineurin-binding protein cabin-1 isoform b
602	IPI00915314	30.19	0	2	1	Y	354290	Tax_Id=9606 Gene_Symbol=SPEG Isoform 4 of Striated muscle preferentially expressed protein kinase
603	IPI00167941	29.98	0	2	1	Y	632827	Tax_Id=9606 Gene_Symbol=MDN1 Midasin
604	IPI00847663	29.87	5	2	2	Y	51450	Tax_Id=9606 Gene_Symbol=PDIA3 cDNA FLJ53558, highly similar to Protein disulfide-isomerase A3
605	IPI01012475	29.87	4	1	1	Y	31920	Tax_Id=9606 Gene_Symbol=PDIA3 Uncharacterized protein
606	IPI01012004	29.87	2	1	1	Y	54103	Tax_Id=9606 Gene_Symbol=PDIA3 cDNA PSEC0175 fis, clone OVARC1000169, highly similar to Protein disulfide-isomerase A3
607	IPI01009528	29.87	2	1	1	Y	54903	Tax_Id=9606 Gene_Symbol=PDIA3 cDNA PSEC0148 fis, clone PLACE1007202, highly similar to Protein disulfide-isomerase A3
608	IPI00021033	29.45	9	8	8	Y	138564	Tax_Id=9606 Gene_Symbol=COL3A1 Isoform 1 of Collagen alpha-1(III) chain
609	IPI00796859	28.52	6	5	4	Y	140929	Tax_Id=9606 Gene_Symbol=SYNGAP1 Isoform 3 of Ras GTPase-activating protein SynGAP
610	IPI00924664	28.52	6	5	4	Y	142865	Tax_Id=9606 Gene_Symbol=SYNGAP1 Uncharacterized protein
611	IPI00759613	28.46	1	14	11	Y	3653160	Tax_Id=9606 Gene_Symbol=TTN Isoform 5 of Titin
612	IPI00985334	28.46	1	12	9	Y	2992897	Tax_Id=9606 Gene_Symbol=TTN titin isoform N2-B
613	IPI00375498	28.46	1	12	9	Y	3006712	Tax_Id=9606 Gene_Symbol=TTN titin isoform novex-1
614	IPI00375499	28.46	1	12	9	Y	3013913	Tax_Id=9606 Gene_Symbol=TTN titin isoform novex-2
615	IPI00914663	28.05	3	3	3	Y	159938	Tax_Id=9606 Gene_Symbol=KCP Isoform 1 of Kielin/chordin-like protein
616	IPI00952922	27.92	4	2	2	N	38553	Tax_Id=9606 Gene_Symbol=KRT13 Uncharacterized protein
617	IPI00550661	27.92	4	2	2	N	38581	Tax_Id=9606 Gene_Symbol=KRT13 Isoform 2 of Keratin, type I cytoskeletal 13
618	IPI00171196	27.92	3	2	2	N	45867	Tax_Id=9606 Gene_Symbol=KRT13 Isoform 3 of Keratin, type I cytoskeletal 13
619	IPI00009866	27.92	3	2	2	N	49588	Tax_Id=9606 Gene_Symbol=KRT13 Isoform 1 of Keratin, type I cytoskeletal 13
620	IPI00328103	27.92	3	1	1	N	49822	Tax_Id=9606 Gene_Symbol=KRT27 Keratin, type I cytoskeletal 27
621	IPI00978939	27.89	3	1	1	N	24868	Tax_Id=9606 Gene_Symbol=TPX2 TPX2 protein (Fragment)
622	IPI00008477	27.89	1	1	1	N	85653	Tax_Id=9606 Gene_Symbol=TPX2 Targeting protein for Xklp2
623	IPI00102661	27.89	1	1	1	N	89393	Tax_Id=9606 Gene_Symbol=TPX2 Uncharacterized protein
624	IPI00158514	27.32	2	3	1	Y	150274	Tax_Id=9606 Gene_Symbol=SBNO2 Isoform 1 of Protein strawberry notch homolog 2
625	IPI00984586	27.14	5	1	1	N	25894	Tax_Id=9606 Gene_Symbol=PRSS3 trypsin-3 isoform 4 preproprotein
626	IPI00843764	27.14	4	1	1	N	26727	Tax_Id=9606 Gene_Symbol=PRSS3 Isoform C of Trypsin-3
627	IPI00220839	27.14	4	1	1	N	28161	Tax_Id=9606 Gene_Symbol=PRSS3 Isoform B of Trypsin-3
628	IPI00976080	27.14	4	1	1	N	28372	Tax_Id=9606 Gene_Symbol=PRSS3 trypsin-3 isoform 3 preproprotein
629	IPI00015614	27.14	4	1	1	N	32529	Tax_Id=9606 Gene_Symbol=PRSS3 Isoform A of Trypsin-3
630	IPI00651691	26.83	1	3	2	Y	482002	Tax_Id=9606 Gene_Symbol=DNAH2 Isoform 2 of Dynein heavy chain 2, axonemal
631	IPI00930504	26.41	0	1	1	N	157690	Tax_Id=9606 Gene_Symbol=FBN2 Isoform 2 of Fibrillin-2
632	IPI00969129	26.41	0	1	1	N	157690	Tax_Id=9606 Gene_Symbol=FBN2 Uncharacterized protein
633	IPI00896516	26.35	2	6	6	Y	598240	Tax_Id=9606 Gene_Symbol=MUC19 Isoform 1 of Mucin-19
634	IPI00794503	26.25	3	1	1	N	31529	Tax_Id=9606 Gene_Symbol=XPNPEP3 Isoform 3 of Probable Xaa-Pro aminopeptidase 3
635	IPI00922407	26.25	2	1	1	N	32712	Tax_Id=9606 Gene_Symbol=XPNPEP3 Isoform 5 of Probable Xaa-Pro aminopeptidase 3
636	IPI00604607	26.25	2	1	1	N	49358	Tax_Id=9606 Gene_Symbol=HSP90AA1 Uncharacterized protein
637	IPI00795212	26.25	2	1	1	N	48112	Tax_Id=9606 Gene_Symbol=XPNPEP3 Isoform 2 of Probable Xaa-Pro aminopeptidase 3
638	IPI00922067	26.25	1	1	1	N	54672	IPI:IPI00922067.2|SWISS-PROT:Q9NQH7
639	IPI00550192	26.25	1	1	1	N	57034	Tax_Id=9606 Gene_Symbol=XPNPEP3 Isoform 1 of Probable Xaa-Pro aminopeptidase 3
640	IPI00784295	26.25	1	1	1	N	84660	Tax_Id=9606 Gene_Symbol=HSP90AA1 Isoform 1 of Heat shock protein HSP 90-alpha
641	IPI00382470	26.25	1	1	1	N	98161	Tax_Id=9606 Gene_Symbol=HSP90AA1 Isoform 2 of Heat shock protein HSP 90-alpha
642	IPI00010221	25.78	3	1	1	N	24474	Tax_Id=9606 Gene_Symbol=VWA1 Isoform 2 of von Willebrand factor A domain-containing protein 1
643	IPI00396383	25.78	2	1	1	N	46804	Tax_Id=9606 Gene_Symbol=VWA1 Isoform 1 of von Willebrand factor A domain-containing protein 1
644	IPI00025427	25.73	4	1	1	Y	18385	Tax_Id=9606 Gene_Symbol=RNASE3 Eosinophil cationic protein
645	IPI01014189	24.82	1	4	3	Y	510406	Tax_Id=9606 Gene_Symbol=MYCBP2 MYC binding protein 2
646	IPI00289776	24.82	1	4	3	Y	513643	Tax_Id=9606 Gene_Symbol=MYCBP2 probable E3 ubiquitin-protein ligase MYCBP2
647	IPI00168624	24.82	2	2	1	Y	98281	Tax_Id=9606 Gene_Symbol=TRPV4 Isoform 1 of Transient receptor potential cation channel subfamily ...
648	IPI00005104	24.82	2	2	1	Y	84640	Tax_Id=9606 Gene_Symbol=CHUK Inhibitor of nuclear factor kappa-B kinase subunit alpha
649	IPI00023711	24.82	1	3	1	Y	231602	Tax_Id=9606 Gene_Symbol=EVPL Envoplakin
650	IPI00973279	24.82	1	2	1	N	355882	Tax_Id=9606 Gene_Symbol=PCNT Isoform 2 of Pericentrin
651	IPI00479143	24.82	1	2	1	N	378039	Tax_Id=9606 Gene_Symbol=PCNT Isoform 1 of Pericentrin
652	IPI00784980	24.81	1	1	1	N	127140	Tax_Id=9606 Gene_Symbol=CCDC158 Isoform 1 of Coiled-coil domain-containing protein 158
653	IPI00943232	24.78	1	1	1	N	91965	Tax_Id=9606 Gene_Symbol=KIF18B Isoform 2 of Kinesin-like protein KIF18B
654	IPI00983277	24.78	1	1	1	N	93921	Tax_Id=9606 Gene_Symbol=KIF18B Isoform 3 of Kinesin-like protein KIF18B
655	IPI00894475	24.78	1	1	1	N	94223	Tax_Id=9606 Gene_Symbol=KIF18B Isoform 1 of Kinesin-like protein KIF18B
656	IPI00979511	24.78	1	1	1	N	95128	Tax_Id=9606 Gene_Symbol=KIF18B Isoform 4 of Kinesin-like protein KIF18B
657	IPI00829780	24.6	1	2	2	N	173310	Tax_Id=9606 Gene_Symbol=CCDC165 Isoform 2 of Coiled-coil domain-containing protein 165
658	IPI00977445	24.3	1	1	1	N	66911	Tax_Id=9606 Gene_Symbol=TM9SF1 Uncharacterized protein
659	IPI00217484	24.13	1	2	1	Y	224401	Tax_Id=9606 Gene_Symbol=CACNA1I Isoform 2 of Voltage-dependent T-type calcium channel subunit alpha-1I
660	IPI00152899	24.13	1	2	1	Y	245101	Tax_Id=9606 Gene_Symbol=CACNA1I Isoform 1 of Voltage-dependent T-type calcium channel subunit alpha-1I
661	IPI00921911	24.13	6	1	1	Y	20719	Tax_Id=9606 Gene_Symbol=CRIP2 Protein
662	IPI00852938	23.89	9	4	4	Y	63353	Tax_Id=9606 Gene_Symbol=COL25A1 Uncharacterized protein
663	IPI00917204	23.79	1	1	1	N	150857	Tax_Id=9606 Gene_Symbol=SOS1 Alternate SOS1
664	IPI00020131	23.79	1	1	1	N	152463	Tax_Id=9606 Gene_Symbol=SOS1 Son of sevenless homolog 1
665	IPI00023756	23.38	4	3	2	Y	138734	Tax_Id=9606 Gene_Symbol=JARID2 Isoform 1 of Protein Jumonji
666	IPI00184484	23.27	1	1	1	N	101473	Tax_Id=9606 Gene_Symbol=GRM1 Uncharacterized protein
667	IPI00290361	23.23	2	1	1	N	38343	Tax_Id=9606 Gene_Symbol=- Putative uncharacterized protein gs93
668	IPI00412673	23.23	1	1	1	N	57993	Tax_Id=9606 Gene_Symbol=LRRC43 Isoform 3 of Leucine-rich repeat-containing protein 43
669	IPI00982101	23.06	6	1	1	Y	28037	Tax_Id=9606 Gene_Symbol=YWHAZ Uncharacterized protein
670	IPI00947298	22.83	5	1	1	N	15096	Tax_Id=9606 Gene_Symbol=TTC14 Uncharacterized protein
671	IPI00945043	22.83	4	1	1	N	20860	Tax_Id=9606 Gene_Symbol=TTC14 Uncharacterized protein
672	IPI00947434	22.83	4	1	1	N	21771	Tax_Id=9606 Gene_Symbol=TTC14 Uncharacterized protein
673	IPI00941278	22.83	2	1	1	N	49735	Tax_Id=9606 Gene_Symbol=TTC14 tetratricopeptide repeat protein 14 isoform b
674	IPI00432278	22.83	1	1	1	N	73826	Tax_Id=9606 Gene_Symbol=TTC14 Isoform 2 of Tetratricopeptide repeat protein 14
675	IPI00550503	22.83	1	1	1	N	88319	Tax_Id=9606 Gene_Symbol=TTC14 Isoform 1 of Tetratricopeptide repeat protein 14
676	IPI00797080	22.28	3	1	1	N	37772	Tax_Id=9606 Gene_Symbol=MARCH9 Isoform 1 of E3 ubiquitin-protein ligase MARCH9
677	IPI00435422	22.23	2	4	3	Y	197494	Tax_Id=9606 Gene_Symbol=SIPA1L1 Isoform 2 of Signal-induced proliferation-associated 1-like protein 1
678	IPI00970965	22.2	2	1	1	N	65748	Tax_Id=9606 Gene_Symbol=MIR3118 POTE ankyrin domain family, member B
679	IPI00745165	21.98	12	3	1	Y	46766	Tax_Id=9606 Gene_Symbol=KAZN Isoform 2 of Kazrin
680	IPI00747400	21.98	1	3	1	Y	153513	Tax_Id=9606 Gene_Symbol=CADPS Uncharacterized protein
681	IPI00012391	21.98	1	3	1	Y	311646	Tax_Id=9606 Gene_Symbol=APC Isoform Long of Ade...
682	IPI00152881	21.98	2	3	1	Y	216856	Tax_Id=9606 Gene_Symbol=SHROOM3 Isoform 1 of Protein Shroom3
683	IPI00964301	21.89	3	2	2	N	139222	Tax_Id=9606 Gene_Symbol=SYNRG Isoform 4 of Synergin gamma
684	IPI00640304	21.79	1	2	1	Y	181084	Tax_Id=9606 Gene_Symbol=PBRM1 Isoform 4 of Protein polybromo-1
685	IPI00873041	21.79	1	2	1	Y	183884	Tax_Id=9606 Gene_Symbol=PBRM1 Isoform 7 of Protein polybromo-1
686	IPI00910435	21.79	1	2	1	Y	189643	Tax_Id=9606 Gene_Symbol=PBRM1 Isoform 8 of Protein polybromo-1
687	IPI00384176	21.79	1	2	1	Y	192946	Tax_Id=9606 Gene_Symbol=PBRM1 Isoform 1 of Protein polybromo-1
688	IPI00456943	21.79	2	2	1	N	106071	Tax_Id=9606 Gene_Symbol=SH3PXD2A Uncharacterized protein
689	IPI01014179	21.79	2	2	1	N	109466	Tax_Id=9606 Gene_Symbol=SH3PXD2A cDNA FLJ57808, highly similar to Homo sapiens SH3 multiple domains 1 (SH3MD1), mRNA
690	IPI00885028	21.72	1	1	1	N	67064	Tax_Id=9606 Gene_Symbol=COLEC12 Isoform 2 of Collectin-12
691	IPI00414467	21.72	1	1	1	N	81515	Tax_Id=9606 Gene_Symbol=COLEC12 Isoform 1 of Collectin-12
692	IPI00844090	21.72	0	1	1	N	183559	Tax_Id=9606 Gene_Symbol=COL5A1 Collagen alpha-1(V) chain
693	IPI00001690	21.58	1	1	1	N	191159	Tax_Id=9606 Gene_Symbol=CUL7 Cullin-7
694	IPI00955011	21.58	1	1	1	N	199748	Tax_Id=9606 Gene_Symbol=CUL7 cullin-7 isoform 1
695	IPI00413958	21.26	1	2	2	Y	287279	Tax_Id=9606 Gene_Symbol=FLNC Isoform 2 of Filamin-C
696	IPI00178352	21.26	1	2	2	Y	291020	Tax_Id=9606 Gene_Symbol=FLNC Isoform 1 of Filamin-C
697	IPI00953109	21.26	0	1	1	Y	271411	Tax_Id=9606 Gene_Symbol=FLNB Isoform 6 of Filamin-B
698	IPI00382697	21.26	0	1	1	Y	273906	Tax_Id=9606 Gene_Symbol=FLNB Isoform 3 of Filamin-B
699	IPI00019088	21.25	4	2	2	Y	65131	Tax_Id=9606 Gene_Symbol=COL9A2 Collagen alpha-2(IX) chain
700	IPI00816814	20.95	1	1	1	N	143978	Tax_Id=9606 Gene_Symbol=SFI1 Isoform 2 of Protein SFI1 homolog
701	IPI00216267	20.93	1	1	1	N	151661	Tax_Id=9606 Gene_Symbol=ABCC1 Isoform 8 of Multidrug resistance-associated protein 1
702	IPI00005776	20.73	3	2	1	Y	107691	Tax_Id=9606 Gene_Symbol=NOD1 Nucleotide-binding oligomerization domain-containing protein 1
703	IPI00794880	20.73	0	2	1	Y	335928	Tax_Id=9606 Gene_Symbol=CHD7 Isoform 1 of Chromodomain-helicase-DNA-binding protein 7
704	IPI00165934	20.7	0	2	1	Y	693082	Tax_Id=9606 Gene_Symbol=GPR98 Isoform 1 of G-protein coupled receptor 98
705	IPI00025463	20.42	10	2	1	Y	45016	Tax_Id=9606 Gene_Symbol=PHLDA1 Pleckstrin homology-like domain family A member 1
706	IPI00922867	20.42	2	3	2	Y	214504	Tax_Id=9606 Gene_Symbol=PTPRB Uncharacterized protein
707	IPI00967250	20.41	4	1	1	N	25305	Tax_Id=9606 Gene_Symbol=RICTOR Uncharacterized protein
708	IPI00477950	20.38	9	1	1	N	10632	Tax_Id=9606 Gene_Symbol=COL4A2 Uncharacterized protein
709	IPI00796452	20.29	1	2	2	N	169692	Tax_Id=9606 Gene_Symbol=PTPRD receptor-type tyrosine-protein phosphatase delta isoform 3 precursor
710	IPI00954886	20.29	1	2	2	N	212131	Tax_Id=9606 Gene_Symbol=PTPRD Isoform 2 of Receptor-type tyrosine-protein phosphatase delta
711	IPI00375548	20.29	1	2	2	N	212158	Tax_Id=9606 Gene_Symbol=PTPRD 212 kDa protein
712	IPI00375547	20.29	1	2	2	N	213319	Tax_Id=9606 Gene_Symbol=PTPRD 213 kDa protein
713	IPI00852829	20.29	1	2	2	N	214758	Tax_Id=9606 Gene_Symbol=PTPRD Isoform 1 of Receptor-type tyrosine-protein phosphatase
