# Supplementary material for: Proteomic analysis of formalin-fixed paraffin-embedded colorectal cancer tissue using tandem mass tag protein labeling
Source: Royal Society of Chemistry journal article supplement (doi:10.1039/c3mb70177h), 2013-08-28
Supplement: c3mb70177h_2.xlsx [file c3mb70177h_2.xlsx]

## Sheet: Sheet1
Table S2: Overview of all quantified proteins found in the ACN dataset. In order to be selected as quantified protein, reporter intensities of each of the six reporter ions should be available.
	Accession	# unique peptides	Description	126	127	128	129	130	131
1	IPI00008603	15	Tax_Id=9606 Gene_Symbol=ACTA2 Actin, aortic smooth muscle	2544000	6245000	8451000	33120000	5776000	14780000
2	IPI00025416	14	Tax_Id=9606 Gene_Symbol=ACTG2 Actin, gamma-enteric smooth muscle	2544000	6245000	8451000	33120000	5776000	14780000
3	IPI00930343	11	Tax_Id=9606 Gene_Symbol=ACTC1 cDNA FLJ78096, highly similar to Homo sapiens actin, alpha, cardiac muscle (ACTC), mRNA	2544000	6245000	8451000	33120000	5776000	14780000
4	IPI00023006	11	Tax_Id=9606 Gene_Symbol=ACTC1 Actin, alpha cardiac muscle 1	2544000	6245000	8451000	33120000	5776000	14780000
5	IPI00021428	11	Tax_Id=9606 Gene_Symbol=ACTA1 Actin, alpha skeletal muscle	2544000	6245000	8451000	33120000	5776000	14780000
6	IPI01011107	6	Tax_Id=9606 Gene_Symbol=ACTC1 Uncharacterized protein	2325000	4247000	5836000	18310000	3582000	9527000
7	IPI00878173	6	Tax_Id=9606 Gene_Symbol=ACTA1 cDNA FLJ39583 fis, clone SKMUS2004897, highly similar to ACTIN, ALPHA SKELETAL MUSCLE	2325000	4247000	5836000	18310000	3582000	9527000
8	IPI00916212	14	Tax_Id=9606 Gene_Symbol=ACTG2 actin, gamma-enteric smooth muscle isoform 2 precursor	2544000	6245000	8451000	33120000	5776000	14780000
9	IPI01018712	15	Tax_Id=9606 Gene_Symbol=ACTA2 ACTA2 protein (Fragment)	2544000	6245000	8451000	33120000	5776000	14780000
10	IPI00220327	25	Tax_Id=9606 Gene_Symbol=KRT1 Keratin, type II cytoskeletal 1	89140	135400	228400	624400	110400	461900
11	IPI00930226	5	Tax_Id=9606 Gene_Symbol=ACTG1 cDNA FLJ57283, highly similar to Actin, cytoplasmic 2	1797000	3339000	3841000	15760000	3094000	8454000
12	IPI00021439	5	Tax_Id=9606 Gene_Symbol=ACTB Actin, cytoplasmic 1	1797000	3339000	3841000	15760000	3094000	8454000
13	IPI00021440	5	Tax_Id=9606 Gene_Symbol=ACTG1 Actin, cytoplasmic 2	1797000	3339000	3841000	15760000	3094000	8454000
14	IPI00984879	12	Tax_Id=9606 Gene_Symbol=ACTA2 cDNA FLJ52761, highly similar to Actin, aortic smooth muscle	2544000	6245000	8451000	33120000	5776000	14780000
15	IPI01011344	4	Tax_Id=9606 Gene_Symbol=ACTG1 Uncharacterized protein	1455000	2530000	2912000	13010000	2499000	7024000
16	IPI00465084	20	Tax_Id=9606 Gene_Symbo...	147900	366500	439800	2098000	334000	926000
17	IPI00922693	2	Tax_Id=9606 Gene_Symbol=ACTB cDNA FLJ53662, highly similar to Actin, alpha skeletal muscle	915400	1352000	1653000	5324000	1257000	2535000
18	IPI00218820	11	Tax_Id=9606 Gene_Symbol=TPM2 Isoform 3 of Tropomyosin beta chain	519400	7603000	8358000	19620000	2752000	7776000
19	IPI00220709	11	Tax_Id=9606 Gene_Symbol=TPM2 Isoform 2 of Tropomyosin beta chain	519400	7603000	8358000	19620000	2752000	7776000
20	IPI01015522	5	Tax_Id=9606 Gene_Symbol=ACTB cDNA FLJ55253, highly similar to Actin, cytoplasmic 1	1797000	3339000	3841000	15760000	3094000	8454000
21	IPI01018925	4	Tax_Id=9606 Gene_Symbol=ACTB cDNA FLJ58286, highly similar to Actin, cytoplasmic 2	1455000	2530000	2912000	13010000	2499000	7024000
22	IPI00019359	16	Tax_Id=9606 Gene_Symbol=KRT9 Keratin, type I cytoskeletal 9	86050	131500	161700	522700	117900	295700
23	IPI00645534	9	Tax_Id=9606 Gene_Symbol=ACTA2 Uncharacterized protein	2240000	5989000	7616000	32630000	5732000	14470000
24	IPI00921887	9	Tax_Id=9606 Gene_Symbol=- cDNA FLJ52755, highly similar to Actin, aortic smooth muscle	2240000	5989000	7616000	32630000	5732000	14470000
25	IPI00917820	8	Tax_Id=9606 Gene_Symbol=ACTG2 Uncharacterized protein	2240000	5989000	7616000	32630000	5732000	14470000
26	IPI00910712	11	Tax_Id=9606 Gene_Symbol=TPM2 cDNA FLJ57036, highly similar to Homo sapiens tropomyosin 2 (beta) (TPM2), transcript variant 2, mRNA	519400	7603000	8358000	19620000	2752000	7776000
27	IPI00414057	5	Tax_Id=9606 Gene_Symbol=ACTA1 Uncharacterized protein	2240000	5989000	7616000	32630000	5732000	14470000
28	IPI00942659	3	Tax_Id=9606 Gene_Symbol=ACTB 14 kDa protein	1455000	2530000	2912000	13010000	2499000	7024000
29	IPI00894365	3	Tax_Id=9606 Gene_Symbol=ACTB cDNA FLJ52842, highly similar to Actin, cytoplasmic 1	1455000	2530000	2912000	13010000	2499000	7024000
30	IPI00654755	8	IPI:IPI00654755.3|SWISS-PROT:P68871	4538000	1650000	4105000	6299000	2195000	5796000
31	IPI00021304	10	Tax_Id=9606 Gene_Symbol=KRT2 Keratin, type II cytoskeletal 2 epidermal	19800	45470	58660	207000	27320	132900
32	IPI01012766	3	IPI:IPI01012766.1|TREMBL:A4UCT3	1349000	2432000	2820000	9722000	2132000	5246000
33	IPI00216134	8	Tax_Id=9606 Gene_Symbol=TPM1 tropomyosin alpha-1 chain isoform 7	504300	7634000	9224000	25330000	2994000	9583000
34	IPI00915324	7	Tax_Id=9606 Gene_Symbol=TPM1 Isoform 6 of Tropomyosin alpha-1 chain	504300	7634000	9224000	25330000	2994000	9583000
35	IPI00000230	7	Tax_Id=9606 Gene_Symbol=TPM1 tropomyosin alpha-1 chain isoform 2	504300	7634000	9224000	25330000	2994000	9583000
36	IPI00940343	7	Tax_Id=9606 Gene_Symbol=TPM1 cDNA FLJ16459 fis, clone BRCAN2002473, moderately similar to Tropomyosin, fibroblast isoform 2	504300	7634000	9224000	25330000	2994000	9583000
37	IPI01018810	8	Tax_Id=9606 Gene_Symbol=HBB Mutant beta-globin	4538000	1650000	4105000	6299000	2195000	5796000
38	IPI00796636	8	Tax_Id=9606 Gene_Symbol=HBB Uncharacterized protein	4538000	1650000	4105000	6299000	2195000	5796000
39	IPI01018020	8	Tax_Id=9606 Gene_Symbol=HBB Beta-globin gene from a thalassemia patient	4538000	1650000	4105000	6299000	2195000	5796000
40	IPI00514530	1	Tax_Id=9606 Gene_Symbol=ACTA1 Uncharacterized protein	231300	408000	619600	2048000	486900	1159000
41	IPI00216135	6	Tax_Id=9606 Gene_Symbol=TPM1 Isoform 3 of Tropomyosin alpha-1 chain	508400	7411000	9085000	24930000	2933000	9321000
42	IPI00296039	6	Tax_Id=9606 Gene_Symbol=TPM1 Isoform 4 of Tropomyosin alpha-1 chain	508400	7411000	9085000	24930000	2933000	9321000
43	IPI00970818	6	Tax_Id=9606 Gene_Symbol=TPM1 tropomyosin alpha-1 chain isoform 5	508400	7411000	9085000	24930000	2933000	9321000
44	IPI00014581	5	Tax_Id=9606 Gene_Symbol=TPM1 Isoform 1 of Tropomyosin alpha-1 chain	508400	7411000	9085000	24930000	2933000	9321000
45	IPI00604537	5	Tax_Id=9606 Gene_Symbol=TPM1 tropomyosin alpha-1 chain isoform 3	508400	7411000	9085000	24930000	2933000	9321000
46	IPI00745267	5	Tax_Id=9606 Gene_Symbol=TPM1 Isoform 2 of Tropomyosin alpha-1 chain	493300	7175000	8832000	24350000	2858000	9022000
47	IPI01018017	5	Tax_Id=9606 Gene_Symbol=TPM1 Uncharacterized protein	493300	7175000	8832000	24350000	2858000	9022000
48	IPI00018853	5	Tax_Id=9606 Gene_Symbol=TPM1 Tropomyosin isoform	493300	7175000	8832000	24350000	2858000	9022000
49	IPI00384369	5	Tax_Id=9606 Gene_Symbol=TPM1 Tropomyosin 1 alpha variant 6	493300	7175000	8832000	24350000	2858000	9022000
50	IPI01017955	5	Tax_Id=9606 Gene_Symbol=- cDNA FLJ55130, highly similar to Rattus norvegicus tropomyosin 1, alpha (Tpm1), transcript variant 8, mRNA	493300	7175000	8832000	24350000	2858000	9022000
51	IPI00917282	2	Tax_Id=9606 Gene_Symbol=ACTG2 Uncharacterized protein	186400	779700	1881000	8297000	869000	2584000
52	IPI00917457	2	Tax_Id=9606 Gene_Symbol=ACTG2 Uncharacterized protein	186400	779700	1881000	8297000	869000	2584000
53	IPI01012191	4	Tax_Id=9606 Gene_Symbol=TPM1 Isoform 5 of Tropomyosin alpha-1 chain	490200	7126000	8763000	24200000	2829000	8980000
54	IPI00921977	4	Tax_Id=9606 Gene_Symbol=TPM1 cDNA FLJ54760, highly similar to Rattus norvegicus tropomyosin 1, alpha (Tpm1), transcript variant 7, mRNA	490200	7126000	8763000	24200000	2829000	8980000
55	IPI00646748	3	Tax_Id=9606 Gene_Symbol=TPM2 Uncharacterized protein	204800	1151000	1447000	4264000	608400	1760000
56	IPI00013991	3	Tax_Id=9606 Gene_Symbol=TPM2 Isoform 1 of Tropomyosin beta chain	204800	1151000	1447000	4264000	608400	1760000
57	IPI00513698	3	Tax_Id=9606 Gene_Symbol=TPM2 Uncharacterized protein	204800	1151000	1447000	4264000	608400	1760000
58	IPI00216138	18	IPI:IPI00216138.6|SWISS-PROT:Q01995	501800	1444000	1154000	2817000	1318000	1744000
59	IPI00218320	2	Tax_Id=9606 Gene_Symbol=TPM3 Isoform 3 of Tropomyosin alpha-3 chain	91140	404300	639000	1831000	239100	842000
60	IPI00382894	2	Tax_Id=9606 Gene_Symbol=TPM3 Uncharacterized protein	91140	404300	639000	1831000	239100	842000
61	IPI00218319	2	Tax_Id=9606 Gene_Symbol=TPM3 Isoform 2 of Tropomyosin alpha-3 chain	91140	404300	639000	1831000	239100	842000
62	IPI00967467	2	Tax_Id=9606 Gene_Symbol=TPM3 33 kDa protein	91140	404300	639000	1831000	239100	842000
63	IPI00010779	1	Tax_Id=9606 Gene_Symbol=TPM4 Isoform 1 of Tropomyosin alpha-4 chain	33090	337000	411000	1033000	146400	388100
64	IPI00216975	1	Tax_Id=9606 Gene_Symbol=TPM4 Isoform 2 of Tropomyosin alpha-4 chain	33090	337000	411000	1033000	146400	388100
65	IPI00009865	10	Tax_Id=9606 Gene_Symbol=KRT10 Keratin, type I cytoskeletal 10	46660	101800	127700	418000	78060	223700
66	IPI00745872	16	Tax_Id=9606 Gene_Symbol=ALB Isoform 1 of Serum albumin	3708000	8319000	17430000	39430000	8255000	35010000
67	IPI00878517	15	Tax_Id=9606 Gene_Symbol=ALB Uncharacterized protein	3708000	8319000	17430000	39430000	8255000	35010000
68	IPI00908876	15	Tax_Id=9606 Gene_Symbol=ALB cDNA FLJ50830, highly similar to Serum albumin	3708000	8319000	17430000	39430000	8255000	35010000
69	IPI00982925	5	Tax_Id=9606 Gene_Symbol=- Truncated beta-globin	4538000	1650000	4105000	6299000	2195000	5796000
70	IPI00940084	4	Tax_Id=9606 Gene_Symbol=TPM1 TPM1 protein variant (Fragment)	490200	7126000	8763000	24200000	2829000	8980000
71	IPI00966829	14	Tax_Id=9606 Gene_Symbol=ALB 69 kDa protein	3708000	8319000	17430000	39430000	8255000	35010000
72	IPI00022434	14	Tax_Id=9606 Gene_Symbol=ALB Uncharacterized protein	3708000	8319000	17430000	39430000	8255000	35010000
73	IPI00965913	14	Tax_Id=9606 Gene_Symbol=ALB Protein	3708000	8319000	17430000	39430000	8255000	35010000
74	IPI00965074	14	Tax_Id=9606 Gene_Symbol=ALB Uncharacterized protein	3708000	8319000	17430000	39430000	8255000	35010000
75	IPI00642042	2	Tax_Id=9606 Gene_Symbol=TPM3 Putative uncharacterized protein DKFZp686J1372	91140	404300	639000	1831000	239100	842000
76	IPI00410714	10	Tax_Id=9606 ...	1689000	626700	1188000	1621000	681900	2225000
77	IPI00807522	1	Tax_Id=9606 Gene_Symbol=ACTB ACTB protein (Fragment)	735200	1484000	1784000	5457000	1158000	2874000
78	IPI00442894	2	Tax_Id=9606 Gene_Symbol=TPM1 cDNA FLJ26372 fis, clone HRT06233	22000	290000	330200	766000	108400	364700
79	IPI00216456	1	Tax_Id=9606 Gene_Symbol=HIST1H2AC Histone H2A type 1-C	242800	402100	520400	1506000	375900	612100
80	IPI00297646	15	Tax_Id=9606 Gene_Symbol=COL1A1 Collagen alpha-1(I) chain	290700	334400	424200	1338000	320200	1212000
81	IPI00418471	12	Tax_Id=9606 Gene_Symbol=VIM Vimentin	243300	600400	613400	1873000	497000	1274000
82	IPI00975690	11	Tax_Id=9606 Gene_Symbol=VIM Vimentin variant 3	243300	600400	613400	1873000	497000	1274000
83	IPI00981034	9	Tax_Id=9606 Gene_Symbol=TAGLN Protein	496100	1295000	1079000	2737000	1143000	1900000
84	IPI00384697	11	Tax_Id=9606 Gene_Symbol=ALB Isoform 2 of Serum albumin	3708000	8319000	17430000	39430000	8255000	35010000
85	IPI00025512	3	Tax_Id=9606 Gene_Symbol=HSPB1 Heat shock protein beta-1	984700	2194000	2297000	11200000	2258000	4457000
86	IPI00031562	1	Tax_Id=9606 Gene_Symbol=HIST3H2A Histone H2A type 3	242800	402100	520400	1506000	375900	612100
87	IPI00026272	2	Tax_Id=9606 Gene_Symbol=HIST1H2AE;HIST1H2AB;HIST...	242800	402100	520400	1506000	375900	612100
88	IPI00339274	1	Tax_Id=9606 Gene_Symbol=HIST2H2AC Histone H2A type 2-C	20400	18100	25150	54340	18100	28320
89	IPI00216457	1	Tax_Id=9606 Gene_Symbol=HIST2H2AA4;HIST2H2AA3 Histone H2A type 2-A	20400	18100	25150	54340	18100	28320
90	IPI00953582	10	Tax_Id=9606 Gene_Symbol=ALB Uncharacterized protein	3708000	8319000	17430000	39430000	8255000	35010000
91	IPI00644576	11	Tax_Id=9606 Gene_Symbol=FLNA Uncharacterized protein	669600	2479000	4059000	13590000	2082000	5668000
92	IPI00302592	11	Tax_Id=9606 Gene_Symbol=FLNA Isoform 2 of Filamin-A	669600	2479000	4059000	13590000	2082000	5668000
93	IPI00333541	11	Tax_Id=9606 Gene_Symbol=FLNA Isoform 1 of Filamin-A	669600	2479000	4059000	13590000	2082000	5668000
94	IPI00556415	7	Tax_Id=9606 Gene_Symbol=TAGLN Uncharacterized protein	153700	519200	418500	988000	480700	412300
95	IPI00219037	1	Tax_Id=9606 Gene_Symbol=H2AFX Histone H2A.x	8224	29310	45060	177700	28290	59780
96	IPI00304962	15	Tax_Id=9606 Gene_Symbol=COL1A2 Collagen alpha-2(I) chain	711200	857900	983600	2256000	899300	2624000
97	IPI01014827	15	Tax_Id=9606 Gene_Symbol=COL1A2 Uncharacterized protein	711200	857900	983600	2256000	899300	2624000
98	IPI00917545	2	Tax_Id=9606 Gene_Symbol=ACTG2 Uncharacterized protein	186400	779700	1881000	8297000	869000	2584000
99	IPI00909207	4	Tax_Id=9606 Gene_Symbol=PRDX2 cDNA FLJ60461, highly similar to Peroxiredoxin-2	217100	337900	371900	1279000	308500	664200
100	IPI00027350	4	Tax_Id=9606 Gene_Symbol=PRDX2 Peroxiredoxin-2	217100	337900	371900	1279000	308500	664200
101	IPI00216773	8	Tax_Id=9606 Gene_Symbol=ALB Uncharacterized protein	3708000	8319000	17430000	39430000	8255000	35010000
102	IPI00909453	3	Tax_Id=9606 Gene_Symbol=HSPB1 cDNA FLJ52243, highly similar to Heat-shock protein beta-1	984700	2194000	2297000	11200000	2258000	4457000
103	IPI01022236	2	Tax_Id=9606 Gene_Symbol=TUBB Uncharacterized protein	652400	1320000	1447000	4944000	1138000	2919000
104	IPI00645452	2	IPI:IPI00645452.1|TREMBL:B4DQN9	652400	1320000	1447000	4944000	1138000	2919000
105	IPI01022164	2	Tax_Id=9606 Gene_Symbol=TUBB Uncharacterized protein	652400	1320000	1447000	4944000	1138000	2919000
106	IPI01020686	2	Tax_Id=9606 Gene_Symbol=TUBB Uncharacterized protein	652400	1320000	1447000	4944000	1138000	2919000
107	IPI01019113	2	IPI:IPI01019113.1|SWISS-PROT:P07437	652400	1320000	1447000	4944000	1138000	2919000
108	IPI01025656	2	Tax_Id=9606 Gene_Symbol=TUBB cDNA FLJ56903, highly similar to Tubulin beta-7 chain	652400	1320000	1447000	4944000	1138000	2919000
109	IPI00815947	3	Tax_Id=9606 Gene_Symbol=HBB Truncated beta-globin (Fragment)	271100	340400	336000	865400	292900	461700
110	IPI00473011	1	Tax_Id=9606 Gene_Symbol=HBD Hemoglobin subunit delta	24570	33020	41980	116900	28080	64740
111	IPI00970839	3	Tax_Id=9606 Gene_Symbol=LOC727848;POTEI Actin-like protein (Fragment)	1455000	2530000	2912000	13010000	2499000	7024000
112	IPI00908770	1	Tax_Id=9606 Gene_Symbol=TUBB cDNA FLJ53063, highly similar to Tubulin beta-7 chain	2864	5536	4992	16700	5184	8320
113	IPI00982343	9	Tax_Id=9606 Gene_Symbol=TAGLN Uncharacterized protein	187000	665600	534000	1238000	617200	505900
114	IPI00930130	2	Tax_Id=9606 Gene_Symbol=TUBB6 cDNA FLJ11352 fis, clone HEMBA1000020, highly similar to Tubulin beta-2C chain	36290	65860	63940	215000	57980	89090
115	IPI00007752	2	Tax_Id=9606 Gene_Symbol=TUBB2C Tubulin beta-2C chain	36290	65860	63940	215000	57980	89090
116	IPI00220278	2	Tax_Id=9606 Gene_Symbol=MYL9 Myosin regulatory light polypeptide 9	108600	374900	305200	594300	320300	256700
117	IPI00555733	3	Tax_Id=9606 Gene_Symbol=- Actin-like protein (Fragment)	1455000	2530000	2912000	13010000	2499000	7024000
118	IPI00640741	4	Tax_Id=9606 Gene_Symbol=PRDX1 19 kDa protein	262100	269000	302800	1379000	285300	524300
119	IPI00000874	4	Tax_Id=9606 Gene_Symbol=PRDX1 Peroxiredoxin-1	262100	269000	302800	1379000	285300	524300
120	IPI00472739	5	Tax_Id=9606 Gene_Symbol=TPSAB1 Isoform 2 of Tryptase alpha/beta-1	675300	1923000	2770000	20480000	2013000	5897000
121	IPI00915376	5	Tax_Id=9606 Gene_Symbol=TPSB2 tryptase beta-2 precursor	675300	1923000	2770000	20480000	2013000	5897000
122	IPI00419942	5	Tax_Id=9606 Gene_Symbol=TPSAB1;TPSB2 Tryptase beta-2	675300	1923000	2770000	20480000	2013000	5897000
123	IPI00010274	5	Tax_Id=9606 Gene_Symbol=TPSAB1 TPSAB1 protein	675300	1923000	2770000	20480000	2013000	5897000
124	IPI00946599	5	Tax_Id=9606 Gene_Symbol=TPSAB1 TPSB2 protein	675300	1923000	2770000	20480000	2013000	5897000
125	IPI00031370	1	Tax_Id=9606 Gene_Symbol=TUBB2B Tubulin beta-2B chain	649600	1315000	1442000	4928000	1133000	2910000
126	IPI00930715	1	Tax_Id=9606 Gene_Symbol=TUBB2A cDNA, FLJ93005, highly similar to Homo sapiens tubulin, beta polypeptide (TUBB), mRNA	649600	1315000	1442000	4928000	1133000	2910000
127	IPI00013475	1	Tax_Id=9606 Gene_Symbol=TUBB2A Tubulin beta-2A chain	649600	1315000	1442000	4928000	1133000	2910000
128	IPI00072918	12	Tax_Id=9606 Gene_Symbol=COL6A3 Uncharacterized protein	68310	188600	322800	1409000	165000	1098000
129	IPI00072917	12	Tax_Id=9606 Gene_Symbol=COL6A3 Uncharacterized protein	68310	188600	322800	1409000	165000	1098000
130	IPI00022200	12	Tax_Id=9606 Gene_Symbol=COL6A3 Isoform 1 of Collagen alpha-3(VI) chain	68310	188600	322800	1409000	165000	1098000
131	IPI00946286	11	Tax_Id=9606 Gene_Symbol=COL6A3 collagen alpha-3(VI) chain isoform 4 precursor	68310	188600	322800	1409000	165000	1098000
132	IPI00220701	11	Tax_Id=9606 Gene_Symbol=COL6A3 Isoform 2 of Collagen alpha-3(VI) chain	68310	188600	322800	1409000	165000	1098000
133	IPI00022433	5	Tax_Id=9606 Gene_Symbol=HSPB6 Heat shock protein beta-6	55660	150300	128100	336000	127500	161400
134	IPI00553169	8	Tax_Id=9606 Gene_Symbol=FLNA Uncharacterized protein	669600	2479000	4059000	13590000	2082000	5668000
135	IPI00854592	2	Tax_Id=9606 Gene_Symbol=TPM3 Uncharacterized protein	91140	404300	639000	1831000	239100	842000
136	IPI01013595	4	Tax_Id=9606 Gene_Symbol=CALD1 Isoform 4 of Caldesmon	78290	414200	530800	1646000	257700	1023000
137	IPI00925125	4	Tax_Id=9606 Gene_Symbol=CALD1 caldesmon isoform 3	78290	414200	530800	1646000	257700	1023000
138	IPI00218694	4	Tax_Id=9606 Gene_Symbol=CALD1 Isoform 2 of Caldesmon	78290	414200	530800	1646000	257700	1023000
139	IPI00014516	4	Tax_Id=9606 Gene_Symbol=CALD1 Isoform 1 of Caldesmon	78290	414200	530800	1646000	257700	1023000
140	IPI00853163	3	Tax_Id=9606 Gene_Symbol=TYMP Uncharacterized protein	6264	9242	12300	42140	8810	19100
141	IPI00292858	3	Tax_Id=9606 Gene_Symbol=...	6264	9242	12300	42140	8810	19100
142	IPI00852987	3	Tax_Id=9606 Gene_Symbol=TYMP cDNA, FLJ95575, highly similar to Homo sapiens endothelial cell growth factor 1 (platelet-derived) (ECGF1), mRNA	6264	9242	12300	42140	8810	19100
143	IPI00293276	4	Tax_Id=9606 Gene_Symbol=MIF Macrophage migration inhibitory factor	102900	150000	138400	269400	157300	185400
144	IPI00333771	3	Tax_Id=9606 Gene_Symbol=CALD1 Isoform 5 of Caldesmon	25180	242800	401500	1320000	126800	853000
145	IPI00218696	3	Tax_Id=9606 Gene_Symbol=CALD1 cDNA FLJ53193, highly similar to Homo sapiens caldesmon 1 (CALD1), transcript variant 5, mRNA	25180	242800	401500	1320000	126800	853000
146	IPI01014398	3	Tax_Id=9606 Gene_Symbol=CALD1 Uncharacterized protein	25180	242800	401500	1320000	126800	853000
147	IPI00218695	3	Tax_Id=9606 Gene_Symbol=CALD1 Isoform 3 of Caldesmon	25180	242800	401500	1320000	126800	853000
148	IPI00878282	4	Tax_Id=9606 Gene_Symbol=ALB 23 kDa protein	361900	407100	2446000	5381000	682800	1565000
149	IPI01015284	1	Tax_Id=9606 Gene_Symbol=MC1R Tubulin, beta, 4 variant (Fragment)	649600	1315000	1442000	4928000	1133000	2910000
150	IPI00013683	1	Tax_Id=9606 Gene_Symbol=TUBB3;MC1R Tubulin beta-3 chain	649600	1315000	1442000	4928000	1133000	2910000
151	IPI01013705	1	Tax_Id=9606 Gene_Symbol=MC1R cDNA, FLJ95457, highly similar to Homo sapiens tubulin, beta, 4 (TUBB4), mRNA	649600	1315000	1442000	4928000	1133000	2910000
152	IPI01026194	1	Tax_Id=9606 Gene_Symbol=TUBB3 88 kDa protein	649600	1315000	1442000	4928000	1133000	2910000
153	IPI01019017	2	IPI:IPI01019017.1|TREMBL:B3KTT5	57890	122800	217300	745700	98430	460500
154	IPI00911039	2	Tax_Id=9606 Gene_Symbol=HSPA1B;HSPA1A cDNA FLJ54408, highly similar to Heat shock 70 kDa protein 1	57890	122800	217300	745700	98430	460500
155	IPI01020720	2	Tax_Id=9606 Gene_Symbol=HSPA1B;HSPA1A cDNA FLJ54328, highly similar to Heat shock 70 kDa protein 1	57890	122800	217300	745700	98430	460500
156	IPI01013544	2	Tax_Id=9606 Gene_Symbol=HSPA1B;HSPA1A Uncharacterized protein	57890	122800	217300	745700	98430	460500
157	IPI01011434	2	Tax_Id=9606 Gene_Symbol=HSPA1B;HSPA1A Uncharacterized protein	57890	122800	217300	745700	98430	460500
158	IPI00304925	2	IPI:IPI00304925.5|SWISS-PROT:P08107	57890	122800	217300	745700	98430	460500
159	IPI00845339	2	Tax_Id=9606 Gene_Symbol=HSPA1B;HSPA1A cDNA FLJ54370, highly similar to Heat shock 70 kDa protein 1	57890	122800	217300	745700	98430	460500
160	IPI01021821	3	Tax_Id=9606 Gene_Symbol=HSP90B1 Protein	52710	115500	182700	927000	108400	708000
161	IPI00939289	3	Tax_Id=9606 Gene_Symbol=HSP90B1 Uncharacterized protein	52710	115500	182700	927000	108400	708000
162	IPI00027230	3	Tax_Id=9606 Gene_Symbol=HSP90B1 Endoplasmin	52710	115500	182700	927000	108400	708000
163	IPI00926274	3	Tax_Id=9606 Gene_Symbol=CALD1 Uncharacterized protein	70450	288500	261600	695900	200300	378200
164	IPI00956684	3	Tax_Id=9606 Gene_Symbol=LGALS3 galectin-3 isoform 2	368200	493300	502100	1400000	430500	528300
165	IPI00465431	3	Tax_Id=9606 Gene_Symbol=LGALS3 Galectin-3	368200	493300	502100	1400000	430500	528300
166	IPI01026139	3	Tax_Id=9606 Gene_Symbol=LGALS3 LGALS3 protein (Fragment)	368200	493300	502100	1400000	430500	528300
167	IPI01018966	2	Tax_Id=9606 Gene_Symbol=UBC Uncharacterized protein	598500	812400	925600	2964000	787200	1234000
168	IPI01013317	2	Tax_Id=9606 Gene_Symbol=RPS27A 40S ribosomal protein S27a	598500	812400	925600	2964000	787200	1234000
169	IPI01014596	2	Tax_Id=9606 Gene_Symbol=UBC Uncharacterized protein	598500	812400	925600	2964000	787200	1234000
170	IPI01014205	2	Tax_Id=9606 Gene_Symbol=UBC Uncharacterized protein	598500	812400	925600	2964000	787200	1234000
171	IPI01015565	2	Tax_Id=9606 Gene_Symbol=UBC Uncharacterized protein	598500	812400	925600	2964000	787200	1234000
172	IPI01011805	2	Tax_Id=9606 Gene_Symbol=UBB cDNA FLJ51326, highly similar to Homo sapiens ubiquitin B (UBB), mRNA	598500	812400	925600	2964000	787200	1234000
173	IPI01015113	2	Tax_Id=9606 Gene_Symbol=UBC Uncharacterized protein	598500	812400	925600	2964000	787200	1234000
174	IPI01015985	2	Tax_Id=9606 Gene_Symbol=UBC Uncharacterized protein	598500	812400	925600	2964000	787200	1234000
175	IPI01011412	2	Tax_Id=9606 Gene_Symbol=UBC Uncharacterized protein	598500	812400	925600	2964000	787200	1234000
176	IPI01015749	2	Tax_Id=9606 Gene_Symbol=UBC cDNA FLJ75516, highly similar to Xenopus tropicalis ubiquitin C, mRNA	598500	812400	925600	2964000	787200	1234000
177	IPI00953417	2	Tax_Id=9606 Gene_Symbol=TUBB Uncharacterized protein	652400	1320000	1447000	4944000	1138000	2919000
178	IPI00022432	3	Tax_Id=9606 Gene_Symbol=TTR Transthyretin	9366	15730	15010	48940	14630	22240
179	IPI00855916	3	Tax_Id=9606 Gene_Symbol=- Transthyretin	9366	15730	15010	48940	14630	22240
180	IPI00940791	3	Tax_Id=9606 Gene_Symbol=TTR Uncharacterized protein	9366	15730	15010	48940	14630	22240
181	IPI00550363	2	Tax_Id=9606 Gene_Symbol=TAGLN2 Transgelin-2	48790	84530	75300	227000	76190	115400
182	IPI00647915	2	Tax_Id=9606 Gene_Symbol=TAGLN2 24 kDa protein	48790	84530	75300	227000	76190	115400
183	IPI00641244	3	Tax_Id=9606 Gene_Symbol=PRDX1 11 kDa protein	127400	144600	176800	924200	158900	325400
184	IPI00219219	2	Tax_Id=9606 Gene_Symbol=LGALS1 Galectin-1	38270	81410	75010	133800	75140	126700
185	IPI00925411	2	Tax_Id=9606 Gene_Symbol=PPIA Uncharacterized protein	69700	109600	115600	743400	115600	233600
186	IPI00925747	2	Tax_Id=9606 Gene_Symbol=PPIA Peptidyl-prolyl cis-trans isomerase	69700	109600	115600	743400	115600	233600
187	IPI00910407	2	Tax_Id=9606 Gene_Symbol=PPIA Peptidyl-prolyl cis-trans isomerase	69700	109600	115600	743400	115600	233600
188	IPI00419585	2	Tax_Id=9606 Gene_Symbol=PPIA Peptidyl-prolyl cis-trans isomerase A	69700	109600	115600	743400	115600	233600
189	IPI00982595	2	Tax_Id=9606 Gene_Symbol=VIM Vimentin variant 4	163200	496900	492000	1393000	404300	1005000
190	IPI00030929	1	Tax_Id=9606 Gene_Symbol=MYL9 myosin regulatory light polypeptide 9 isoform b	107100	372900	302400	585200	318000	252900
191	IPI00793930	2	Tax_Id=9606 Gene_Symbol=TUBA1B TUBA1B protein	275600	564600	692600	2024000	402800	1239000
192	IPI01022358	2	Tax_Id=9606 Gene_Symbol=TUBA1A Alpha-tubulin	275600	564600	692600	2024000	402800	1239000
193	IPI00218343	2	Tax_Id=9606 Gene_Symbol=TUBA1C Tubulin alpha-1C chain	275600	564600	692600	2024000	402800	1239000
194	IPI00930688	2	Tax_Id=9606 Gene_Symbol=TUBA1B Tubulin alpha-1B chain	275600	564600	692600	2024000	402800	1239000
195	IPI00180675	2	Tax_Id=9606 Gene_Symbol=TUBA1A Tubulin alpha-1A chain	275600	564600	692600	2024000	402800	1239000
196	IPI00387144	2	Tax_Id=9606 Gene_Symbol=TUBA1C cDNA FLJ55956, highly similar to Tubulin alpha-6 chain	275600	564600	692600	2024000	402800	1239000
197	IPI00166768	2	Tax_Id=9606 Gene_Symbol=TUBA1C Uncharacterized protein	275600	564600	692600	2024000	402800	1239000
198	IPI00909530	5	Tax_Id=9606 Gene_Symbol=H3F3A;H3F3B;H3F3AP6;H3F3AP4 cDNA FLJ52843, highly similar to Histone H3.3	599600	2176000	6759000	17150000	2200000	8331000
199	IPI00419884	5	Tax_Id=9606 Gene_Symbol=H3F3C Histone H3.3C	599600	2176000	6759000	17150000	2200000	8331000
200	IPI00219038	5	IPI:IPI00219038.9|SWISS-PROT:P84243	599600	2176000	6759000	17150000	2200000	8331000
201	IPI00171611	5	Tax_Id=9606 Gene_Symbol=HIST2H3D;HIST2H3A;HIST2H3C Histon...	599600	2176000	6759000	17150000	2200000	8331000
202	IPI00465070	5	IPI:IPI00465070.7|SWISS-PROT:P68431	599600	2176000	6759000	17150000	2200000	8331000
203	IPI01022933	2	Tax_Id=9606 Gene_Symbol=MYL6 Uncharacterized protein	430800	1013000	835100	2083000	974500	1287000
204	IPI01022268	2	Tax_Id=9606 Gene_Symbol=MYL6 Uncharacterized protein	430800	1013000	835100	2083000	974500	1287000
205	IPI00789605	2	Tax_Id=9606 Gene_Symbol=MYL6 Isoform Smooth muscle of Myosin light polypeptide 6	430800	1013000	835100	2083000	974500	1287000
206	IPI00335168	2	Tax_Id=9606 Gene_Symbol=MYL6 Isoform Non-muscle of Myosin light polypeptide 6	430800	1013000	835100	2083000	974500	1287000
207	IPI01022653	2	Tax_Id=9606 Gene_Symbol=MYL6 17 kDa protein	430800	1013000	835100	2083000	974500	1287000
208	IPI01022179	2	Tax_Id=9606 Gene_Symbol=MYL6 17 kDa protein	430800	1013000	835100	2083000	974500	1287000
209	IPI01021801	2	Tax_Id=9606 Gene_Symbol=MYL6 18 kDa protein	430800	1013000	835100	2083000	974500	1287000
210	IPI00796366	2	Tax_Id=9606 Gene_Symbol=MYL6 cDNA FLJ56329, highly similar to Myosin light polypeptide 6	430800	1013000	835100	2083000	974500	1287000
211	IPI00220739	2	Tax_Id=9606 Gene_Symbol=PGRMC1 Membrane-associated progesterone receptor component 1	21890	41470	37950	117500	38660	51200
212	IPI00220573	1	Tax_Id=9606 Gene_Symbol=MYL12A Myosin regulatory light chain 12A	8320	14820	14980	44160	14720	18880
213	IPI00033494	1	Tax_Id=9606 Gene_Symbo...	8320	14820	14980	44160	14720	18880
214	IPI00291175	4	Tax_Id=9606 Gene_Symbol=VCL Isoform 1 of Vinculin	36000	59460	88130	330200	53040	210200
215	IPI00307162	4	Tax_Id=9606 Gene_Symbol=VCL Isoform 2 of Vinculin	36000	59460	88130	330200	53040	210200
216	IPI00719669	1	Tax_Id=9606 Gene_Symbol=MYL12B Similar to Myosin regulatory light chain MRCL2	8320	14820	14980	44160	14720	18880
217	IPI00807611	2	Tax_Id=9606 Gene_Symbol=CALD1 CALD1 protein (Fragment)	2496	56700	88110	253400	26050	159500
218	IPI00816770	2	Tax_Id=9606 Gene_Symbol=CALD1 Uncharacterized protein	2496	56700	88110	253400	26050	159500
219	IPI01014563	1	Tax_Id=9606 Gene_Symbol=FTL Ferritin light chain	26940	17020	23700	82050	18190	99840
220	IPI00216402	4	Tax_Id=9606 Gene_Symbol=HIST3H3 Histone H3.1t	279200	695200	2148000	5357000	751000	3335000
221	IPI00477080	4	Tax_Id=9606 Gene_Symbol=H3F3A;H3F3B;H3F3AP6;H3F3AP4 cDNA FLJ57905, moderately similar to Histone H3.3	478600	2026000	6503000	16460000	2018000	7695000
222	IPI00455457	4	Tax_Id=9606 Gene_Symbol=- Uncharacterized protein	478600	2026000	6503000	16460000	2018000	7695000
223	IPI00025252	2	Tax_Id=9606 Gene_Symbol=PDIA3 Protein disulfide-isomerase A3	11090	34970	57120	313300	27510	206800
224	IPI00941465	9	Tax_Id=9606 Gene_Symbol=COL6A3 Uncharacterized protein	40560	109000	193200	998600	109100	783200
225	IPI00220403	3	Tax_Id=9606 Gene_Symbol=HIST1H2BB Histone H2B type 1-B	1104000	2572000	2857000	11690000	2598000	4012000
226	IPI00419833	3	Tax_Id=9606 Gene_Symbol=HIST1H2BK Histone H2B type 1-K	1104000	2572000	2857000	11690000	2598000	4012000
227	IPI00329665	3	Tax_Id=9606 Gene_Symbol=HIST2H2BF Histone H2B type 2-F	1104000	2572000	2857000	11690000	2598000	4012000
228	IPI00303133	3	Tax_Id=9606 Gene_Symbol=HIST1H2BH Histone H2B type 1-H	1104000	2572000	2857000	11690000	2598000	4012000
229	IPI00554798	3	Tax_Id=9606 Gene_Symbol=HIST1H2BM Histone H2B type 1-M	1104000	2572000	2857000	11690000	2598000	4012000
230	IPI00020101	3	IPI:IPI00020101.9|SWISS-PROT:P62807	1104000	2572000	2857000	11690000	2598000	4012000
231	IPI00152906	3	Tax_Id=9606 Gene_Symbol=HIST1H2BD Histone H2B type 1-D	1104000	2572000	2857000	11690000	2598000	4012000
232	IPI00815755	3	Tax_Id=9606 Gene_Symbol=HIST1H2BCHIST1H2BC protein	1104000	2572000	2857000	11690000	2598000	4012000
233	IPI00515061	3	Tax_Id=9606 Gene_Symbol=HIST1H2BJ Histone H2B type 1-J	1104000	2572000	2857000	11690000	2598000	4012000
234	IPI00003935	3	Tax_Id=9606 Gene_Symbol=HIST2H2BE Histone H2B type 2-E	1104000	2572000	2857000	11690000	2598000	4012000
235	IPI00018534	3	Tax_Id=9606 Gene_Symbol=HIST1H2BL Histone H2B type 1-L	1104000	2572000	2857000	11690000	2598000	4012000
236	IPI00152785	3	Tax_Id=9606 Gene_Symbol=HIST1H2BO Histone H2B type 1-O	1104000	2572000	2857000	11690000	2598000	4012000
237	IPI00930174	3	Tax_Id=9606 Gene_Symbol=HIST2H2BF histone H2B type 2-F isoform b	1104000	2572000	2857000	11690000	2598000	4012000
238	IPI00646240	3	Tax_Id=9606 Gene_Symbol=HIST2H2BF Histone H2B	1104000	2572000	2857000	11690000	2598000	4012000
239	IPI00794461	3	Tax_Id=9606 Gene_Symbol=HIST1H2BN Histone H2B type 1-N	1104000	2572000	2857000	11690000	2598000	4012000
240	IPI01021744	2	Tax_Id=9606 Gene_Symbol=TPM3 cDNA FLJ35393 fis, clone SKNSH2000971, highly similar to TROPOMYOSIN, CYTOSKELETAL TYPE	91140	404300	639000	1831000	239100	842000
241	IPI00909961	2	Tax_Id=9606 Gene_Symbol=TPM3 cDNA FLJ50720, highly similar to Homo sapiens tropomyosin 3 (TPM3), transcript variant 2, mRNA	91140	404300	639000	1831000	239100	842000
242	IPI00796316	3	Tax_Id=9606 Gene_Symbol=GSN Uncharacterized protein	21620	84500	168100	1059000	83980	716800
243	IPI01015050	3	Tax_Id=9606 Gene_Symbol=GSN Uncharacterized protein	21620	84500	168100	1059000	83980	716800
244	IPI00646773	3	IPI:IPI00646773.2|SWISS-PROT:P06396	21620	84500	168100	1059000	83980	716800
245	IPI01009415	3	Tax_Id=9606 Gene_Symbol=GSN Uncharacterized protein	21620	84500	168100	1059000	83980	716800
246	IPI00647556	3	Tax_Id=9606 Gene_Symbol=GSN gelsolin isoform c	21620	84500	168100	1059000	83980	716800
247	IPI00026314	3	Tax_Id=9606 Gene_Symbol=GSN Isoform 1 of Gelsolin	21620	84500	168100	1059000	83980	716800
248	IPI00479145	2	Tax_Id=9606 Gene_Symbol=KRT19 Keratin, type I cytoskeletal 19	9180	18720	19920	86400	15120	45920
249	IPI01019081	1	Tax_Id=9606 Gene_Symbol=ACTB Actin-like protein (Fragment)	675700	915900	1212000	3804000	859700	1711000
250	IPI01014726	3	Tax_Id=9606 Gene_Symbol=CNN1 cDNA, FLJ79305, highly similar to Calponin-1	144900	458100	475500	2631000	427100	800900
251	IPI01015371	3	Tax_Id=9606 Gene_Symbol=CNN1 cDNA FLJ59763, highly similar to Calponin-1	144900	458100	475500	2631000	427100	800900
252	IPI00021264	3	Tax_Id=9606 Gene_Symbol=CNN1 Calponin-1	144900	458100	475500	2631000	427100	800900
253	IPI00641047	2	Tax_Id=9606 Gene_Symbol=GSN Uncharacterized protein	21620	84500	168100	1059000	83980	716800
254	IPI00477495	2	Tax_Id=9606 Gene_Symbol=H2BFS Histone H2B type F-S	342300	633700	592000	1842000	538700	677600
255	IPI00414696	2	Tax_Id=9606 Gene_Symbol=HNRNPA2B1 Isoform A2 of Heterogeneous nuclear ribonucleoproteins A2/B1	62510	74280	108500	945300	112400	368800
256	IPI00396378	2	Tax_Id=9606 Gene_Symbol=HNRNPA2B1 Isoform B1 of Heterogeneous nuclear ribonucleoproteins A2/B1	62510	74280	108500	945300	112400	368800
257	IPI00879610	1	Tax_Id=9606 Gene_Symbol=PDIA3 Uncharacterized protein	3410	8380	13920	79040	5380	38240
258	IPI00796736	1	Tax_Id=9606 Gene_Symbol=PDIA3 Uncharacterized protein	3410	8380	13920	79040	5380	38240
259	IPI00893541	1	Tax_Id=9606 Gene_Symbol=PDIA3 14 kDa protein	3410	8380	13920	79040	5380	38240
260	IPI00909762	1	Tax_Id=9606 Gene_Symbol=TUBA1A cDNA FLJ53765, highly similar to Tubulin alpha chain	256500	500000	600400	1751000	366700	1079000
261	IPI00893733	1	Tax_Id=9606 Gene_Symbol=AGR2 13 kDa protein	737200	1119000	1414000	4537000	974500	2163000
262	IPI00893886	1	Tax_Id=9606 Gene_Symbol=AGR3 Protein	737200	1119000	1414000	4537000	974500	2163000
263	IPI00894341	1	Tax_Id=9606 Gene_Symbol=AGR3 Uncharacterized protein	737200	1119000	1414000	4537000	974500	2163000
264	IPI00152409	1	Tax_Id=9606 Gene_Symbol=AGR3 Anterior gradient protein 3 homolog	737200	1119000	1414000	4537000	974500	2163000
265	IPI00942032	1	Tax_Id=9606 Gene_Symbol=AGR2 Anterior gradient protein 2 homolog	737200	1119000	1414000	4537000	974500	2163000
266	IPI00893607	1	Tax_Id=9606 Gene_Symbol=AGR2 Uncharacterized protein	737200	1119000	1414000	4537000	974500	2163000
267	IPI00007427	1	Tax_Id=9606 Gene_Symbol=AGR2 AGR2	737200	1119000	1414000	4537000	974500	2163000
268	IPI00383581	2	Tax_Id=9606 Gene_Symbol=GANAB cDNA FLJ61290, highly similar to Neutral alpha-glucosidase AB	10400	17540	27980	113900	15680	70210
269	IPI00794777	1	Tax_Id=9606 Gene_Symbol=PRDX2 Uncharacterized protein	128000	186100	210800	674600	167700	354400
270	IPI00644531	1	Tax_Id=9606 Gene_Symbol=TAGLN2 21 kDa protein	39170	60290	56700	185600	53950	87170
271	IPI00947530	1	Tax_Id=9606 Gene_Symbol=TAGLN3 Uncharacterized protein	9620	24240	18600	41440	22240	28240
272	IPI00005981	1	Tax_Id=9606 Gene_Symbo...	9620	24240	18600	41440	22240	28240
273	IPI00220301	2	Tax_Id=9606 Gene_Symbol=PRDX6 Peroxiredoxin-6	118900	188800	196100	725500	161200	303600
274	IPI00328113	4	Tax_Id=9606 Gene_Symbol=FBN1 Fibrillin-1	7471	17200	28720	122100	20160	79820
275	IPI00911004	1	Tax_Id=9606 Gene_Symbol=P4HB cDNA FLJ59939, highly similar to Protein disulfide-isomerase	14690	30910	70400	429100	37380	231400
276	IPI00878551	1	Tax_Id=9606 Gene_Symbol=P4HB cDNA FLJ59430, highly similar to Protein disulfide-isomerase	14690	30910	70400	429100	37380	231400
277	IPI00010796	1	Tax_Id=9606 Gene_Symbol=P4HB Protein disulfide-isomerase	14690	30910	70400	429100	37380	231400
278	IPI00657767	2	Tax_Id=9606 Gene_Symbol=FLNA FLNA protein (Fragment)	105900	323500	617900	1918000	229500	849900
279	IPI00910863	2	Tax_Id=9606 Gene_Symbol=FLNA cDNA FLJ57890, highly similar to Filamin-A	105900	323500	617900	1918000	229500	849900
280	IPI00552416	2	Tax_Id=9606 Gene_Symbol=FLNA Uncharacterized protein	105900	323500	617900	1918000	229500	849900
281	IPI01024873	1	Tax_Id=9606 Gene_Symbol=TUBB3 14 kDa protein	649600	1315000	1442000	4928000	1133000	2910000
282	IPI01025600	1	Tax_Id=9606 Gene_Symbol=TUBB3 16 kDa protein	649600	1315000	1442000	4928000	1133000	2910000
283	IPI01024745	1	Tax_Id=9606 Gene_Symbol=TUBB3 18 kDa protein	649600	1315000	1442000	4928000	1133000	2910000
284	IPI00719622	2	Tax_Id=9606 Gene_Symbol=RPS28 40S ribosomal protein S28	6208	11140	12770	56960	11420	21500
285	IPI00974374	1	Tax_Id=9606 Gene_Symbol=PPIA Uncharacterized protein	9380	17750	21170	70110	13550	32030
286	IPI00956104	1	Tax_Id=9606 Gene_Symbol=- Peptidylprolyl isomerase A-like, isoform CRA_a	9380	17750	21170	70110	13550	32030
287	IPI01025684	1	Tax_Id=9606 Gene_Symbol=CALM3;CALM2;CALM1 9 kDa protein	40470	113200	144400	335600	96060	69140
288	IPI01025362	1	Tax_Id=9606 Gene_Symbol=CALM3;CALM2;CALM1 11 kDa protein	40470	113200	144400	335600	96060	69140
289	IPI00945782	1	Tax_Id=9606 Gene_Symbol=CALM3;CALM2;CALM1 Uncharacterized protein	40470	113200	144400	335600	96060	69140
290	IPI00386621	1	Tax_Id=9606 Gene_Symbol=CALM3;CALM2;CALM1 CALM3 protein	40470	113200	144400	335600	96060	69140
291	IPI00075248	1	IPI:IPI00075248.11|SWISS-PROT:P62158	40470	113200	144400	335600	96060	69140
292	IPI00794543	1	Tax_Id=9606 Gene_Symbol=CALM1 cDNA FLJ75174, highly similar to Homo sapiens calmodulin 1 (phosphorylase kinase, delta), mRNA	40470	113200	144400	335600	96060	69140
293	IPI00916600	1	Tax_Id=9606 Gene_Symbol=CALM3;CALM2;CALM1 Uncharacterized protein	40470	113200	144400	335600	96060	69140
294	IPI00927825	2	Tax_Id=9606 Gene_Symbol=FLNA Uncharacterized protein	136100	716600	1487000	6898000	606000	2468000
295	IPI00794728	2	Tax_Id=9606 Gene_Symbol=NME1;NME2;NME1-NME2 Uncharacterized protein	49600	91840	104600	636200	101400	246400
296	IPI00790982	2	Tax_Id=9606 Gene_Symbol=NME1;NME2;NME1-NME2 Uncharacterized protein	49600	91840	104600	636200	101400	246400
297	IPI00797082	2	Tax_Id=9606 Gene_Symbol=NME1;NME2;NME1-NME2 nucleoside diphosphate kinase B isoform b	49600	91840	104600	636200	101400	246400
298	IPI01014620	2	Tax_Id=9606 Gene_Symbol=NME1;NME2;NME1-NME2 Uncharacterized protein	49600	91840	104600	636200	101400	246400
299	IPI00026260	2	IPI:IPI00026260.1|SWISS-PROT:P22392	49600	91840	104600	636200	101400	246400
300	IPI00012048	2	Tax_Id=9606 Gene_Symbol=NME1;NME2;NME1-NME2 Isoform 1 of Nucleoside diphosphate kinase A	49600	91840	104600	636200	101400	246400
301	IPI00375531	2	Tax_Id=9606 Gene_Symbol=NME1;NME2;NME1-NME2 Isoform 2 of Nucleoside diphosphate kinase A	49600	91840	104600	636200	101400	246400
302	IPI00795292	2	Tax_Id=9606 Gene_Symbol=NME1;NME2;NME1-NME2 Isoform 3 of Nucleoside diphosphate kinase B	49600	91840	104600	636200	101400	246400
303	IPI00604590	2	Tax_Id=9606 Gene_Symbol=NME1;NME2;NME1-NME2 Nucleoside diphosphate kinase	49600	91840	104600	636200	101400	246400
304	IPI00966258	2	Tax_Id=9606 Gene_Symbol=UCHL1 Uncharacterized protein	12620	26470	26350	84220	24970	42300
305	IPI00018352	2	Tax_Id=9606 Gene_Symbol=UCHL1 Ubiquitin carboxyl-terminal hydrolase isozyme L1	12620	26470	26350	84220	24970	42300
306	IPI00910350	1	Tax_Id=9606 Gene_Symbol=MAPRE1 cDNA FLJ52068, highly similar to Microtubule-associated protein RP/EB family member 1	37970	77020	94380	280600	79350	72200
307	IPI00017596	1	Tax_Id=9606 Gene_Symbol=MAPRE1 Microtubule-associated protein RP/EB family member 1	37970	77020	94380	280600	79350	72200
308	IPI00022774	2	Tax_Id=9606 Gene_Symbol=VCP Transitional endoplasmic reticulum ATPase	4368	18370	25920	81410	10460	57090
309	IPI00639945	3	Tax_Id=9606 Gene_Symbol=PRDX4 Protein	127400	144600	176800	924200	158900	325400
310	IPI00647280	3	Tax_Id=9606 Gene_Symbol=PRDX4 Uncharacterized protein	127400	144600	176800	924200	158900	325400
311	IPI00011937	3	Tax_Id=9606 Gene_Symbol=PRDX4 Peroxiredoxin-4	127400	144600	176800	924200	158900	325400
312	IPI00926763	1	Tax_Id=9606 Gene_Symbol=CALD1 Uncharacterized protein	2496	7168	6128	13020	6032	7776
313	IPI00853068	2	Tax_Id=9606 Gene_Symbol=HBA2;HBA1 Hemoglobin alpha-2	63560	99710	123800	429500	92410	230300
314	IPI00641229	3	Tax_Id=9606 Gene_Symbol=IGHA2 Ig alpha-2 chain C region	411800	1179000	1589000	7297000	1172000	3842000
315	IPI00940245	3	Tax_Id=9606 Gene_Symbol=IGHA2 Immunoglobulin heavy chain variant (Fragment)	411800	1179000	1589000	7297000	1172000	3842000
316	IPI00784950	3	Tax_Id=9606 Gene_Symbol=IGHA2 Putative uncharacterized protein DKFZp686L19235	411800	1179000	1589000	7297000	1172000	3842000
317	IPI00785067	3	Tax_Id=9606 Gene_Symbol=IGHA2 IGH@ protein	411800	1179000	1589000	7297000	1172000	3842000
318	IPI00784758	3	Tax_Id=9606 Gene_Symbol=IGHA2 Putative uncharacterized protein DKFZp686M08189	411800	1179000	1589000	7297000	1172000	3842000
319	IPI00784830	3	Tax_Id=9606 Gene_Symbol=IGHA2 cDNA FLJ41981 fis, clone SMINT2011888, highly similar to Protein Tro alpha1 H,myeloma	411800	1179000	1589000	7297000	1172000	3842000
320	IPI00642017	3	Tax_Id=9606 Gene_Symbol=IGHA2 Putative uncharacterized protein DKFZp686C02218 (Fragment)	411800	1179000	1589000	7297000	1172000	3842000
321	IPI00449920	3	Tax_Id=9606 Gene_Symbol=IGHA1 cDNA FLJ90170 fis, clone MAMMA1000370, highly similar to Ig alpha-1 chain C region	411800	1179000	1589000	7297000	1172000	3842000
322	IPI00386879	3	Tax_Id=9606 Gene_Symbol=IGHA1 cDNA FLJ14473 fis, clone MAMMA1001080, highly similar to Homo sapiens SNC73 protein (SNC73) mRNA	411800	1179000	1589000	7297000	1172000	3842000
323	IPI00647704	3	Tax_Id=9606 Gene_Symbol=IGHA1 cDNA FLJ41552 fis, clone COLON2004478, highly similar to Protein Tro alpha1 H,myeloma	411800	1179000	1589000	7297000	1172000	3842000
324	IPI00978930	3	Tax_Id=9606 Gene_Symbol=ADD2;LOC440354 Ig alpha-1 chain C region	411800	1179000	1589000	7297000	1172000	3842000
325	IPI00386524	3	Tax_Id=9606 Gene_Symbol=IGHA1 CDNA FLJ25298 fis, clone STM07683, highly similar to Protein Tro alpha1 H,myeloma	411800	1179000	1589000	7297000	1172000	3842000
326	IPI00383164	3	Tax_Id=9606 Gene_Symbol=IGHA1 SNC66 protein	411800	1179000	1589000	7297000	1172000	3842000
327	IPI01015266	3	Tax_Id=9606 Gene_Symbol=IGHA2 Putative uncharacterized protein DKFZp686O16217 (Fragment)	411800	1179000	1589000	7297000	1172000	3842000
328	IPI00423461	3	Tax_Id=9606 Gene_Symbol=IGHA2 Putative uncharacterized protein DKFZp686C02220 (Fragment)	411800	1179000	1589000	7297000	1172000	3842000
329	IPI00423460	3	Tax_Id=9606 Gene_Symbol=IGHA1 Putative uncharacterized protein DKFZp686G21220 (Fragment)	411800	1179000	1589000	7297000	1172000	3842000
330	IPI00426060	3	Tax_Id=9606 Gene_Symbol=IGHA1 Putative uncharacterized protein DKFZp686J11235 (Fragment)	411800	1179000	1589000	7297000	1172000	3842000
331	IPI00423462	3	Tax_Id=9606 Gene_Symbol=IGHA1 Putative uncharacterized protein DKFZp686K18196 (Fragment)	411800	1179000	1589000	7297000	1172000	3842000
332	IPI01015099	2	Tax_Id=9606 Gene_Symbol=UBE2V2 12 kDa protein	9614	15180	13820	43820	14170	20770
333	IPI00019600	2	Tax_Id=9606 Gene_Symbol=UBE2V2 Ubiquitin-conjugating enzyme E2 variant 2	9614	15180	13820	43820	14170	20770
334	IPI01022141	1	Tax_Id=9606 Gene_Symbol=HSPA1L Uncharacterized protein	6368	15550	33020	173600	14270	88060
335	IPI01021676	1	Tax_Id=9606 Gene_Symbol=HSPA1L cDNA FLJ56517, highly similar to Heat shock 70 kDa protein 1L	6368	15550	33020	173600	14270	88060
336	IPI00830052	1	Tax_Id=9606 Gene_Symbol=HSPA1L Uncharacterized protein	6368	15550	33020	173600	14270	88060
337	IPI00939442	1	Tax_Id=9606 Gene_Symbol=HSPA1L Heat shock 70 kDa protein 1-like	6368	15550	33020	173600	14270	88060
338	IPI00893099	1	Tax_Id=9606 Gene_Symbol=HSPA1L Uncharacterized protein	6368	15550	33020	173600	14270	88060
339	IPI00643152	1	Tax_Id=9606 Gene_Symbol=HSPA1L cDNA FLJ56386, highly similar to Heat shock 70 kDa protein 1L	6368	15550	33020	173600	14270	88060
340	IPI00981926	1	Tax_Id=9606 Gene_Symbol=HSPA8 Uncharacterized protein	3584	4304	9152	48130	5088	28800
341	IPI00980651	1	Tax_Id=9606 Gene_Symbol=HSPA8 Uncharacterized protein	3584	4304	9152	48130	5088	28800
342	IPI00981268	1	Tax_Id=9606 Gene_Symbol=HSPA8 Uncharacterized protein	3584	4304	9152	48130	5088	28800
343	IPI00981429	1	Tax_Id=9606 Gene_Symbol=HSPA8 Uncharacterized protein	3584	4304	9152	48130	5088	28800
344	IPI01008803	1	Tax_Id=9606 Gene_Symbol=HSPA8 Uncharacterized protein	3584	4304	9152	48130	5088	28800
345	IPI00910870	1	Tax_Id=9606 Gene_Symbol=HSPA8 cDNA FLJ59163, highly similar to Heat shock cognate 71 kDa protein	3584	4304	9152	48130	5088	28800
346	IPI00984226	1	Tax_Id=9606 Gene_Symbol=HSPA8 Uncharacterized protein	3584	4304	9152	48130	5088	28800
347	IPI00037070	1	Tax_Id=9606 Gene_Symbol=HSPA8 Uncharacterized protein	3584	4304	9152	48130	5088	28800
348	IPI00003865	1	Tax_Id=9606 Gene_Symbol=HSP...	3584	4304	9152	48130	5088	28800
349	IPI00647695	2	IPI:IPI00647695.3|TREMBL:A2ABS5;E9PBN5	45220	79680	99840	382500	78530	172000
350	IPI00646524	1	Tax_Id=9606 Gene_Symbol=DDAH2 Uncharacterized protein	45220	79680	99840	382500	78530	172000
351	IPI00645821	1	IPI:IPI00645821.2|TREMBL:Q5SSV3	45220	79680	99840	382500	78530	172000
352	IPI00797462	1	IPI:IPI00797462.1|TREMBL:Q5SRR8	45220	79680	99840	382500	78530	172000
353	IPI00000760	1	IPI:IPI00000760.1|SWISS-PROT:O95865	45220	79680	99840	382500	78530	172000
354	IPI00909344	3	Tax_Id=9606 Gene_Symbol=KHSRP cDNA FLJ51330, highly similar to Far upstream element-binding protein 2	4096	4880	14780	45820	5984	37630
355	IPI00855957	3	Tax_Id=9606 Gene_Symbol=KHSRP Isoform 2 of Far upstream element-binding protein 2	4096	4880	14780	45820	5984	37630
356	IPI00479786	3	Tax_Id=9606 Gene_Symbol=KHSRP Isoform 1 of Far upstream element-binding protein 2	4096	4880	14780	45820	5984	37630
357	IPI00916763	2	Tax_Id=9606 Gene_Symbol=HSPE1 Uncharacterized protein	33600	50720	52000	266000	44830	77730
358	IPI00220362	2	Tax_Id=9606 Gene_Symbol=HSPE1 10 kDa heat shock protein, mitochondrial	33600	50720	52000	266000	44830	77730
359	IPI00983633	2	Tax_Id=9606 Gene_Symbol=HSPE1-PHOCN HSPE1-MOBKL3 protein	33600	50720	52000	266000	44830	77730
360	IPI00376200	2	Tax_Id=9606 Gene_Symbol=TPSD1 Isoform 2 of Tryptase delta	644100	1874000	2703000	20120000	1955000	5761000
361	IPI01018188	2	Tax_Id=9606 Gene_Symbol=TPSAB1 Mast cell tryptase beta III	644100	1874000	2703000	20120000	1955000	5761000
362	IPI00953339	2	Tax_Id=9606 Gene_Symbol=TPSD1 Uncharacterized protein	644100	1874000	2703000	20120000	1955000	5761000
363	IPI00419573	2	Tax_Id=9606 Gene_Symbol=TPSD1 Isoform 1 of Tryptase delta	644100	1874000	2703000	20120000	1955000	5761000
364	IPI00003362	2	Tax_Id=9606 Gene_Symbol=HSPA5 78 kDa glucose-regulated protein	6320	19920	37340	162000	15870	116000
365	IPI01015016	1	Tax_Id=9606 Gene_Symbol=UBC Uncharacterized protein	301800	441200	443700	1594000	421000	657200
366	IPI00910553	1	Tax_Id=9606 Gene_Symbol=PRDX6 cDNA FLJ51310, moderately similar to Peroxiredoxin-6	118500	188300	195600	723500	160800	302800
367	IPI00514669	1	Tax_Id=9606 Gene_Symbol=SH3BGRL3 Uncharacterized protein	7392	15230	13440	47740	16320	21180
368	IPI00746352	1	Tax_Id=9606 Gene_Symbol=SH3BGRL3 SH3 domain-binding glutamic acid-rich-like protein 3	7392	15230	13440	47740	16320	21180
369	IPI00010402	1	Tax_Id=9606 Gene_Symbol=SH3BGRL3 Putative uncharacterized protein	7392	15230	13440	47740	16320	21180
370	IPI00955848	1	Tax_Id=9606 Gene_Symbol=- SH3 domain binding glutamic acid-rich protein like 3, isoform CRA_a (Fragment)	7392	15230	13440	47740	16320	21180
371	IPI00166293	2	Tax_Id=9606 Gene_Symbol=HIST3H2BB Histone H2B type 3-B	971200	2282000	2628000	11000000	2370000	3677000
372	IPI00930570	2	Tax_Id=9606 Gene_Symbol=HIST1H2BD Histone H2B	971200	2282000	2628000	11000000	2370000	3677000
373	IPI00010555	3	Tax_Id=9606 Gene_Symbol=SORBS1 Isoform 2 of Sorbin and SH3 domain-containing protein 1	10820	17600	47100	236500	18820	80130
374	IPI00807389	3	Tax_Id=9606 Gene_Symbol=SORBS1 Isoform 11 of Sorbin and SH3 domain-containing protein 1	10820	17600	47100	236500	18820	80130
375	IPI00306791	3	Tax_Id=9606 Gene_Symbol=SORBS1 Similar to Sorbin and SH3 domain containing 1 isoform 1	10820	17600	47100	236500	18820	80130
376	IPI00383430	2	Tax_Id=9606 Gene_Symbol=SORBS1 Isoform 7 of Sorbin and SH3 domain-containing protein 1	10820	17600	47100	236500	18820	80130
377	IPI00186452	2	Tax_Id=9606 Gene_Symbol=SORBS1 Isoform 10 of Sorbin and SH3 domain-containing protein 1	10820	17600	47100	236500	18820	80130
378	IPI00922621	2	Tax_Id=9606 Gene_Symbol=- cDNA FLJ54732, moderately similar to Sorbin and SH3 domain-containing protein 1	10820	17600	47100	236500	18820	80130
379	IPI00010554	2	Tax_Id=9606 Gene_Symbol=SORBS1 Isoform 3 of Sorbin and SH3 domain-containing protein 1	10820	17600	47100	236500	18820	80130
380	IPI00454951	2	Tax_Id=9606 Gene_Symbol=SORBS1 Isoform 5 of Sorbin and SH3 domain-containing protein 1	10820	17600	47100	236500	18820	80130
381	IPI00426075	1	Tax_Id=9606 Gene_Symbol=SORBS1 Putative uncharacterized protein DKFZp686N08224	10820	17600	47100	236500	18820	80130
382	IPI00454950	1	Tax_Id=9606 Gene_Symbol=SORBS1 Isoform 4 of Sorbin and SH3 domain-containing protein 1	10820	17600	47100	236500	18820	80130
383	IPI00654848	1	Tax_Id=9606 Gene_Symbol=SORBS1 cDNA FLJ60072, highly similar to Homo sapiens sorbin and SH3 domain containing 1 (SORBS1), transcript variant 6, mRNA	10820	17600	47100	236500	18820	80130
384	IPI00002491	1	Tax_Id=9606 Gene_Symbol=SORBS1 Isoform 9 of Sorbin and SH3 domain-containing protein 1	10820	17600	47100	236500	18820	80130
385	IPI00064591	1	Tax_Id=9606 Gene_Symbol=SORBS1 Isoform 8 of Sorbin and SH3 domain-containing protein 1	10820	17600	47100	236500	18820	80130
386	IPI00334908	1	Tax_Id=9606 Gene_Symbol=SORBS1 Isoform 6 of Sorbin and SH3 domain-containing protein 1	10820	17600	47100	236500	18820	80130
387	IPI01018230	1	Tax_Id=9606 Gene_Symbol=SORBS1 Isoform 12 of Sorbin and SH3 domain-containing protein 1	10820	17600	47100	236500	18820	80130
388	IPI00023704	1	Tax_Id=9606 Gene_Symbol=LPP Lipoma-preferred partner	1288	2920	2136	7392	2192	4160
389	IPI00386638	4	Tax_Id=9606 Gene_Symbol=TAGLN Transgelin variant 1	79010	222800	192200	460700	209700	186000
390	IPI01012346	2	Tax_Id=9606 Gene_Symbol=S100A4 Uncharacterized protein	9344	15760	16640	42430	15460	19140
391	IPI00032313	2	Tax_Id=9606 Gene_Sy...	9344	15760	16640	42430	15460	19140
392	IPI01021398	1	Tax_Id=9606 Gene_Symbol=UBE2N Uncharacterized protein	151400	375000	353300	1108000	348200	385300
393	IPI01021220	1	Tax_Id=9606 Gene_Symbol=UBE2N Uncharacterized protein	151400	375000	353300	1108000	348200	385300
394	IPI00003949	1	Tax_Id=9606 Gene_Symbol=UBE2N Ubiquitin-conjugating enzyme E2 N	151400	375000	353300	1108000	348200	385300
395	IPI01020774	1	Tax_Id=9606 Gene_Symbol=UBE2N Uncharacterized protein	151400	375000	353300	1108000	348200	385300
396	IPI00376844	1	Tax_Id=9606 Gene_Symbol=UBE2NL Putative ubiquitin-conjugating enzyme E2 N-like	151400	375000	353300	1108000	348200	385300
397	IPI00375281	3	Tax_Id=9606 Gene_Symbol=AKAP13 A-kinase anchor protein 13 isoform 3	2225000	3077000	478500	1805000	332700	1201000
398	IPI00829717	3	Tax_Id=9606 Gene_Symbol=AKAP13 Isoform 3 of A-kinase anchor protein 13	2225000	3077000	478500	1805000	332700	1201000
399	IPI00829774	3	Tax_Id=9606 Gene_Symbol=AKAP13 Isoform 4 of A-kinase anchor protein 13	2225000	3077000	478500	1805000	332700	1201000
400	IPI00329783	3	Tax_Id=9606 Gene_Symbol=AKAP13 Isoform 1 of A-kinase anchor protein 13	2225000	3077000	478500	1805000	332700	1201000
401	IPI00872432	3	Tax_Id=9606 Gene_Symbol=AKAP13 308 kDa protein	2225000	3077000	478500	1805000	332700	1201000
402	IPI00065931	3	Tax_Id=9606 Gene_Symbol=AKAP13 Isoform 2 of A-kinase anchor protein 13	2225000	3077000	478500	1805000	332700	1201000
403	IPI01009467	1	Tax_Id=9606 Gene_Symbol=FBN1 Uncharacterized protein	4752	10080	19390	76800	13700	60290
404	IPI01009156	1	Tax_Id=9606 Gene_Symbol=FBN1 Uncharacterized protein	4752	10080	19390	76800	13700	60290
405	IPI00382699	2	Tax_Id=9606 Gene_Symbol=FLNB Isoform 5 of Filamin-B	191900	883100	1881000	8101000	743100	2893000
406	IPI00382698	2	Tax_Id=9606 Gene_Symbol=FLNB Isoform 4 of Filamin-B	191900	883100	1881000	8101000	743100	2893000
407	IPI00940093	2	Tax_Id=9606 Gene_Symbol=FLNB Isoform 7 of Filamin-B	191900	883100	1881000	8101000	743100	2893000
408	IPI00943563	2	Tax_Id=9606 Gene_Symbol=FLNB Isoform 2 of Filamin-B	191900	883100	1881000	8101000	743100	2893000
409	IPI00477536	2	Tax_Id=9606 Gene_Symbol=FLNB filamin-B isoform 3	191900	883100	1881000	8101000	743100	2893000
410	IPI00289334	2	Tax_Id=9606 Gene_Symbol=FLNB Isoform 1 of Filamin-B	191900	883100	1881000	8101000	743100	2893000
411	IPI00900293	2	Tax_Id=9606 Gene_Symbol=FLNB filamin-B isoform 1	191900	883100	1881000	8101000	743100	2893000
412	IPI00306322	7	Tax_Id=9606 Gene_Symbol=COL4A2 Collagen alpha-2(IV) chain	35220	85140	132600	490500	78180	255100
413	IPI00936857	7	Tax_Id=9606 Gene_Symbol=COL4A2 Uncharacterized protein	35220	85140	132600	490500	78180	255100
414	IPI00900324	2	Tax_Id=9606 Gene_Symbol=SYNPO2 Isoform 1 of Synaptopodin-2	3410	12280	20160	87680	13960	21760
415	IPI00900276	2	Tax_Id=9606 Gene_Symbol=SYNPO2 Isoform 3 of Synaptopodin-2	3410	12280	20160	87680	13960	21760
416	IPI00966171	2	Tax_Id=9606 Gene_Symbol=SYNPO2 Protein	3410	12280	20160	87680	13960	21760
417	IPI00173549	2	Tax_Id=9606 Gene_Symbol=SYNPO2 Isoform 2 of Synaptopodin-2	3410	12280	20160	87680	13960	21760
418	IPI00471928	1	Tax_Id=9606 Gene_Symbol=ATP5A1 ATP synthase subunit alpha	5136	13700	16260	73280	11850	25630
419	IPI00908963	1	Tax_Id=9606 Gene_Symbol=ATP5A1 ATP synthase subunit alpha	5136	13700	16260	73280	11850	25630
420	IPI00440493	1	Tax_Id=9606 Gene_Symbol=ATP5A1 ATP synthase subunit alpha, mitochondrial	5136	13700	16260	73280	11850	25630
421	IPI01018892	1	Tax_Id=9606 Gene_Symbol=CFL1 Uncharacterized protein	112400	290900	255000	599000	296900	270100
422	IPI00909841	1	Tax_Id=9606 Gene_Symbol=- cDNA FLJ51435, moderately similar to Cofilin-1	112400	290900	255000	599000	296900	270100
423	IPI00979518	1	Tax_Id=9606 Gene_Symbol=CFL1 Uncharacterized protein	112400	290900	255000	599000	296900	270100
424	IPI00012011	1	Tax_Id=9606 Gene_Symbol=CFL1 Cofilin-1	112400	290900	255000	599000	296900	270100
425	IPI00984795	1	Tax_Id=9606 Gene_Symbol=CFL1 Uncharacterized protein	112400	290900	255000	599000	296900	270100
426	IPI01010474	13	Tax_Id=9606 Gene_Symbol=TTN Titin	1388	2624	3512	11870	2184	5184
427	IPI00940872	13	Tax_Id=9606 Gene_Symbol=TTN Titin, isoform CRA_a	1388	2624	3512	11870	2184	5184
428	IPI01018745	12	Tax_Id=9606 Gene_Symbol=TTN titin isoform N2-A	1388	2624	3512	11870	2184	5184
429	IPI00759637	12	Tax_Id=9606 Gene_Symbol=TTN Isoform 4 of Titin	1388	2624	3512	11870	2184	5184
430	IPI00179357	12	Tax_Id=9606 Gene_Symbol=TTN Isoform 7 of Titin	1388	2624	3512	11870	2184	5184
431	IPI00023283	12	Tax_Id=9606 Gene_Symbol=TTN Isoform 2 of Titin	1388	2624	3512	11870	2184	5184
432	IPI00759754	12	Tax_Id=9606 Gene_Symbol=TTN Isoform 1 of Titin	1388	2624	3512	11870	2184	5184
433	IPI00759542	12	Tax_Id=9606 Gene_Symbol=TTN Isoform 8 of Titin	1388	2624	3512	11870	2184	5184
434	IPI00006690	2	Tax_Id=9606 Gene_Symbol=EPX Eosinophil peroxidase	3904	7344	6464	20860	7456	12030
435	IPI00975638	1	Tax_Id=9606 Gene_Symbol=CTSB Uncharacterized protein	155900	213200	215500	779500	205600	473100
436	IPI00982206	1	Tax_Id=9606 Gene_Symbol=CTSB Uncharacterized protein	155900	213200	215500	779500	205600	473100
437	IPI00982855	1	Tax_Id=9606 Gene_Symbol=CTSB Uncharacterized protein	155900	213200	215500	779500	205600	473100
438	IPI00981711	1	Tax_Id=9606 Gene_Symbol=CTSB Uncharacterized protein	155900	213200	215500	779500	205600	473100
439	IPI00978088	1	Tax_Id=9606 Gene_Symbol=CTSB Uncharacterized protein	155900	213200	215500	779500	205600	473100
440	IPI00983480	1	Tax_Id=9606 Gene_Symbol=CTSB Uncharacterized protein	155900	213200	215500	779500	205600	473100
441	IPI00983365	1	Tax_Id=9606 Gene_Symbol=CTSB Uncharacterized protein	155900	213200	215500	779500	205600	473100
442	IPI00984553	1	Tax_Id=9606 Gene_Symbol=CTSB Uncharacterized protein	155900	213200	215500	779500	205600	473100
443	IPI00978678	1	Tax_Id=9606 Gene_Symbol=CTSB Uncharacterized protein	155900	213200	215500	779500	205600	473100
444	IPI00976781	1	Tax_Id=9606 Gene_Symbol=CTSB Uncharacterized protein	155900	213200	215500	779500	205600	473100
445	IPI01011636	1	Tax_Id=9606 Gene_Symbol=CTSB Uncharacterized protein	155900	213200	215500	779500	205600	473100
446	IPI00909303	1	Tax_Id=9606 Gene_Symbol=CTSB cDNA FLJ58073, moderately similar to Cathepsin B	155900	213200	215500	779500	205600	473100
447	IPI00295741	1	IPI:IPI00295741.4|SWISS-PROT:P07858|TREMBL:A8K2H4;Q6LAF9	155900	213200	215500	779500	205600	473100
448	IPI01022848	1	Tax_Id=9606 Gene_Symbol=ARPC3 Uncharacterized protein	53600	70400	67840	172800	64480	71200
449	IPI00796102	1	Tax_Id=9606 Gene_Symbol=ARPC3 Uncharacterized protein	53600	70400	67840	172800	64480	71200
450	IPI00911088	1	Tax_Id=9606 Gene_Symbol=ARPC3 cDNA FLJ51245, highly similar to Actin-related protein 2/3 complex subunit 3	53600	70400	67840	172800	64480	71200
451	IPI00005162	1	Tax_Id=9606 Gene_Symbol=ARPC3 Actin-related protein 2/3 complex subunit 3	53600	70400	67840	172800	64480	71200
452	IPI00816687	1	Tax_Id=9606 Gene_Symbol=FGB FGB protein (Fragment)	26480	40980	49950	160300	42370	306900
453	IPI00298497	1	Tax_Id=9606 Gene_Symbol=FGB Fibrinogen beta chain	26480	40980	49950	160300	42370	306900
454	IPI00759806	1	Tax_Id=9606 Gene_Symbol=ENO1 Isoform MBP-1 of Alpha-enolase	35830	59220	83280	617800	71080	276000
455	IPI00465248	1	Tax_Id=9606 Gene_Symbol=ENO1 Isoform alpha-enolase of Alpha-enolase	35830	59220	83280	617800	71080	276000
456	IPI00167217	1	Tax_Id=9606 Gene_Symbol=NOTCH2 CDNA FLJ25506 fis, clone CBR05185	6624	10780	13570	45820	9984	24000
457	IPI00746251	1	Tax_Id=9606 Gene_Symbol=HIST2H2BD Putative histone H2B type 2-D	762000	1938000	2265000	9844000	2059000	3335000
458	IPI00454695	1	Tax_Id=9606 Gene_Symbol=- Putative histone H2B type 2-C	762000	1938000	2265000	9844000	2059000	3335000
459	IPI00965543	5	Tax_Id=9606 Gene_Symbol=COL11A1 collagen alpha-1(XI) chain isoform C preproprotein	64900	280700	373900	1275000	242400	465100
460	IPI00295575	5	Tax_Id=9606 Gene_Symbol=COL11A1 Isoform A of Collagen alpha-1(XI) chain	64900	280700	373900	1275000	242400	465100
461	IPI00878349	1	Tax_Id=9606 Gene_Symbol=CABIN1 calcineurin-binding protein cabin-1 isoform b	7392	12960	30530	87810	13310	69120
462	IPI00847663	2	Tax_Id=9606 Gene_Symbol=PDIA3 cDNA FLJ53558, highly similar to Protein disulfide-isomerase A3	7680	26590	43200	234200	22130	168600
463	IPI01012475	1	Tax_Id=9606 Gene_Symbol=PDIA3 Uncharacterized protein	7680	26590	43200	234200	22130	168600
464	IPI01012004	1	Tax_Id=9606 Gene_Symbol=PDIA3 cDNA PSEC0175 fis, clone OVARC1000169, highly similar to Protein disulfide-isomerase A3	7680	26590	43200	234200	22130	168600
465	IPI01009528	1	Tax_Id=9606 Gene_Symbol=PDIA3 cDNA PSEC0148 fis, clone PLACE1007202, highly similar to Protein disulfide-isomerase A3	7680	26590	43200	234200	22130	168600
466	IPI00021033	8	Tax_Id=9606 Gene_Symbol=COL3A1 Isoform 1 of Collagen alpha-1(III) chain	29570	68500	75420	242800	61330	130200
467	IPI00914663	3	Tax_Id=9606 Gene_Symbol=KCP Isoform 1 of Kielin/chordin-like protein	3800	7808	7024	22780	7056	11870
468	IPI00025427	1	Tax_Id=9606 Gene_Symbol=RNASE3 Eosinophil cationic protein	5120	9120	13370	124400	15460	61790
469	IPI00921911	1	Tax_Id=9606 Gene_Symbol=CRIP2 Protein	22590	48260	46460	117000	44030	52740
470	IPI00413958	2	Tax_Id=9606 Gene_Symbol=FLNC Isoform 2 of Filamin-C	129200	706600	1468000	6808000	595200	2398000
471	IPI00178352	2	Tax_Id=9606 Gene_Symbol=FLNC Isoform 1 of Filamin-C	129200	706600	1468000	6808000	595200	2398000
Intensities of the six reporters are shown
